1 **Smallpox vaccination induces a substantial increase in commensal skin**  
2 **bacteria that promote pathology and enhance immunity**

3

4 Evgeniya V. Shmeleva<sup>1,#a</sup>, Mercedes Gomez de Agüero<sup>2</sup>, Josef Wagner<sup>3,#b</sup>, Anton J. Enright<sup>1</sup>, Andrew  
5 J. Macpherson<sup>2</sup>, Brian J. Ferguson<sup>1\*</sup> and Geoffrey L. Smith<sup>1\*</sup>

6

7 <sup>1</sup>Department of Pathology, University of Cambridge, Cambridge, UK.

8 <sup>2</sup>Maurice Müller Laboratories, Department for Biomedical Research, Universitätsklinik für Viszerale  
9 Chirurgie und Medizin Inselspital, University of Bern, Bern, Switzerland.

10 <sup>3</sup>Parasites and Microbes, Wellcome Sanger Institute, Wellcome Genome Campus, Hinxton,  
11 Cambridge, UK

12

13 <sup>#a</sup>Current address: Department of Obstetrics & Gynaecology, University of Cambridge, Cambridge,  
14 UK

15 <sup>#b</sup>Current address: The Peter Doherty Institute for Infection and Immunity, Melbourne, Australia

16

17 \*Joint senior authorship and to whom correspondence should be sent:

18 Geoffrey L. Smith [gls37@cam.ac.uk](mailto:gls37@cam.ac.uk), Brian J. Ferguson [bf234@cam.ac.uk](mailto:bf234@cam.ac.uk)

19

20 Short Title: Smallpox vaccination increases commensal skin bacteria that promote pathology and  
21 enhance immunity

22

23

## 24 **Abstract**

25 Interactions between pathogens, host microbiota and the immune system influence many physiological  
26 and pathological processes. In the 20<sup>th</sup> century, widespread dermal vaccination with vaccinia virus  
27 (VACV) led to the eradication of smallpox but how VACV interacts with the microbiota and whether  
28 this influences the efficacy of vaccination are largely unknown. Here we report that intradermal  
29 vaccination with VACV induces a large increase in the number of commensal bacteria in infected  
30 tissue, which enhance recruitment of inflammatory cells, promote tissue damage and increase  
31 immunity. Treatment of vaccinated specific-pathogen-free (SPF) mice with antibiotic, or infection of  
32 genetically-matched germ-free (GF) animals caused smaller lesions without alteration in virus titre.  
33 Tissue damage correlated with enhanced neutrophil and T cell infiltration and levels of pro-  
34 inflammatory tissue cytokines and chemokines. One month after vaccination, GF mice had reduced  
35 VACV-neutralising antibodies compared to SPF mice; while numbers of VACV-specific CD8<sup>+</sup> T cells  
36 were equal in all groups of animals. Thus, skin microbiota may provide an adjuvant-like stimulus  
37 during vaccination with VACV. This observation has implications for dermal vaccination with live  
38 vaccines.

39

## 40 **Author Summary**

41 Smallpox was caused by variola virus and was eradicated by widespread dermal vaccination with  
42 vaccinia virus (VACV), a related orthopoxvirus of unknown origin. Eradication was declared in 1980  
43 without an understanding of the immunological correlates of protection, or knowledge of the effect of  
44 smallpox vaccination on the local microbiota. Here we demonstrate that intradermal infection of mice  
45 with VACV induces a ~1000-fold expansion of commensal skin bacteria that influence the recruitment  
46 of inflammatory cells into the infected tissue and enhance the size of the vaccination lesion. Antibiotic  
47 treatment reduced lesion size without changing virus titres. The bacterial expansion also contributes to

48 the level of neutralizing antibodies at one month post vaccination, because genetically matched germ-  
49 free mice developed lower neutralizing antibodies than specific pathogen free controls. Thus, dermal  
50 infection by VACV enhanced bacterial growth and these bacteria promote pathology and enhance the  
51 antibody response. This finding has implication for dermal vaccination with live vaccines.

52

## 53 **Introduction**

54 Vaccinia virus (VACV) is the live vaccine that was used to eradicate smallpox, a disease caused by the  
55 related orthopoxvirus, variola virus, and declared eradicated by the World Health Organisation in 1980  
56 (1). During the smallpox eradication campaign, early vaccine batches were grown on the flanks of  
57 animals and, consequently, were not bacteriologically sterile. Vaccination was achieved by multiple  
58 skin puncture using a bifurcated needle containing a drop of vaccine suspended between the two  
59 prongs of the needle. Therefore, both the vaccine and the method of vaccination may have introduced  
60 bacteria into the vaccination site. Following vaccination a local lesion developed that healed in 2-3  
61 weeks and left a characteristic vaccination scar. A careful study of smallpox vaccination outcomes in  
62 the USA described several serious dermal or neurological complications of vaccination (2), although  
63 bacterial infection of the vaccination site was not highlighted. Vaccination induced long-lasting  
64 humoral and cellular responses, although the precise immunological correlates of vaccination remain  
65 uncertain (3). VACV encodes scores of proteins that block the innate immune response and induce  
66 local immunosuppression (4) and manipulation of these proteins can affect virulence and adaptive  
67 immunity (5).

68

69 Secondary bacterial infection is sometimes a consequence of viral infection; classic examples are  
70 bacterial pneumonia following influenza virus, respiratory syncytial virus or parainfluenza virus  
71 infection (6). These bacterial infections may be promoted by virus-induced tissue damage facilitating

72 bacterial entry into tissue, loss of anti-microbial proteins, or virus-induced immunosuppression  
73 enabling invasion by commensal organisms. Bacteria causing these secondary infections are often  
74 derived from the host microbiota (7, 8). Bacterial infection has been described following infection by  
75 several poxviruses including avipoxvirus (9), cowpoxvirus (10), monkeypox virus (11) and variola  
76 virus (12) although this was not highlighted as a complication of smallpox vaccination (2).

77

78 Vaccine development can be a slow and expensive process and understanding how to deliver antigens  
79 optimally to induce strong adaptive immunity remains poor. In particular, understanding how innate  
80 immunity leads to development of adaptive immunity is incomplete (13, 14). The activation of  
81 dendritic cells by innate immunity enhances antigen presentation and thereby improves the adaptive  
82 memory response (15), but innate immunity may also cause swift elimination of antigens, and so  
83 diminish adaptive immunity (16). Since bacterial components are sometimes used as adjuvants to  
84 enhance innate immunity and vaccine efficacy (17), studying the role of microbiota following  
85 vaccination is important.

86

87 In this study, the mouse intradermal model of VACV infection (18) was used to make a detailed  
88 investigation of the recruitment of inflammatory cells into the infected tissue. Previously, the cellular  
89 infiltrate in this model was found to contain abundant neutrophils and T cells and was markedly  
90 different to the response to respiratory infection (19). Neutrophil recruitment is a hallmark of bacterial  
91 infection (20) and this led to the discovery here that the local skin microbiota expanded greatly  
92 following dermal VACV infection. Data from vaccinated antibiotic-treated or germ free (GF) mice  
93 showed that the pathology at the site of the viral infection is dominated by commensal bacteria, without  
94 influencing virus replication. Notably, depletion of bacteria resulted in alteration to both the cellular  
95 infiltration into infected tissue and the subsequent adaptive immune response.

96

97 This study highlights a role for commensal bacteria in enhancing the immune response following  
98 dermal vaccination and has implication for other vaccines based upon infectious poxviruses or other  
99 viral vectors that are delivered by dermal vaccination.

100

## 101 **Results**

### 102 **Neutrophils infiltrate ear tissue after intradermal vaccination with vaccinia virus**

103 Intradermal (i.d.) infection of the mouse ear pinnae with VACV strain Western Reserve (WR) results  
104 in the development of a skin lesion at the site of infection that mimics smallpox vaccination in man. A  
105 lesion appears at d 6 post infection (p.i.), increases gradually to about d 10 and resolves by d 21 (18).  
106 The model has been used to study the contribution of individual VACV proteins to virulence and  
107 immunogenicity (21, 22).

108

109 Here the local innate and cellular immune responses to i.d. vaccination with VACV were characterised  
110 in detail, including quantifying subpopulations of infiltrating myeloid cells throughout infection. Flow  
111 cytometry showed a substantial increase in CD45<sup>+</sup>CD3<sup>-</sup>CD5<sup>-</sup>CD19<sup>-</sup>NK1.1<sup>-</sup>CD11c<sup>+</sup>Siglec-F<sup>+</sup>Ly6G<sup>+</sup>  
112 cells (neutrophils) in ear tissue at all times p.i. (Fig 1A, B). Along with the surface markers, the  
113 morphological characteristics of this population (spherical ~8-10 µm cells with highly segmented  
114 nuclei) confirmed their identity as neutrophils (S1 Fig) (23). The number of neutrophils increased up  
115 to 10 d p.i., and by d 5 had increased ~130 fold compared to mock-infected tissue (Fig 1B), coinciding  
116 with the first appearance of a dermal lesion. Neutrophils are part of the innate immune system and are  
117 front-line effector cells for defense against bacterial infection (20). Their abundance in VACV-infected  
118 tissue suggested that bacterial co-infection might be present.

119

### 120 **Skin microbiota expand after VACV infection**

121 To investigate if there is an expansion of bacteria after i.d. infection with VACV, bacterial colony-  
122 forming units (CFUs) in infected tissue were quantified. CFUs in VACV-infected tissue was at least  
123 100-fold greater than mock-infected tissue at all time points (Fig 1C) and at the peak at 10 d p.i. was  
124 about 1000-fold greater than control (Fig 1D). Given that the virus inoculum was bacteriologically  
125 sterile, these results suggest increased growth of commensal bacteria after VACV infection, possibly  
126 due to local virus-induced immunosuppression. Notably, the time of maximum number of bacteria and  
127 neutrophils correlated with maximum lesion size, suggesting a link between skin microbiota and the  
128 severity of pathology.

129

### 130 **Skin microbiota composition changes after VACV infection**

131 To investigate the identity of the bacteria present during infection and to compare this with the  
132 microbiome in uninfected skin, 16S ribosomal RNA gene (rRNA) sequencing was performed. So that  
133 bacteria from the skin surface and within lesions was included, total genomic DNA was extracted  
134 directly from whole VACV-infected and non-infected ear tissues and next generation sequencing of  
135 the amplified V4 region of bacterial 16S rRNA was performed. Sequencing was carried out from  
136 material extracted directly from infected tissues without prior culturing to avoid bias introduced by the  
137 culturability of bacteria that might be present.

138

139 Almost all the bacterial families found belonged to: 1) *Firmicutes* (*Rhodobacteraceae*,  
140 *Lachnospiraceae*, *Planococcaceae*, *Aerococcaceae*, *Clostridiaceae*, *Carnobacteriaceae*, *Bacillaceae*,  
141 *Staphylococcaceae*, *Lactobacillaceae*, *Streptococcaceae*, *Clostridiaceae*, *Ruminococcaceae*,  
142 *Veillonellaceae*, *Erysipelotrichaceae*); 2) *Actinobacteria* (*Micrococcaceae*, *Corynebacteriaceae*,  
143 *Actinomycetaceae*, *Dietziaceae*, *Nocardiaceae*, *Propionibacteriaceae*, *Nocardoidaceae*,  
144 *Microbacteriaceae*); 3) *Proteobacteria* (*Aurantimonadaceae*, *Methylobacteriaceae*,

145 *Sphingomonadaceae*, *Burkholderiaceae*, *Comamonadaceae*, *Oxalobacteraceae*, *Neisseriaceae*,  
146 *Desulfovibrionaceae*, *Alteromonadaceae*, *Enterobacteriaceae*, *Halomonadaceae*, *Pasteurellaceae*,  
147 *Moraxellaceae*, *Pseudomonadaceae*, *Caulobacteraceae*, *Xanthomonadaceae*); and 4) Bacteroidetes  
148 (*Bacteroidaceae*, *Porphyromonadaceae*, *Prevotellaceae*, *Chitinophagaceae*, *Cytophagaceae*,  
149 *Flavobacteriaceae*) (S2A Fig). These are consistent with mouse skin microbiota reported previously  
150 (24, 25), suggesting that the source of the enhanced numbers of bacteria in VACV-infected tissue is  
151 the skin rather than environment.

152  
153 Analysis of bacterial sequences at the family, genus and species levels showed significant changes in  
154 the composition of skin microbiota following infection with VACV (Fig 2, S2 and S3 Figs). Although  
155 mock-infection itself resulted in moderate modification of skin microbiome, the most significant  
156 changes occurred at d 5, 8 and 12 p.i., especially d 8 and 12, which was clearly demonstrated by  
157 principal component analysis (Fig 2A, S2B and S3A Figs) as well as multivariate beta diversity  
158 analysis (S1 Table). The relative abundance of some dominant genera in intact skin such as  
159 *Sporosarcina* and *Staphylococcus* decreased at late times post VACV infection, while the proportion  
160 of *Streptococcus*, *Enhydrobacter* and *Corynebacterium* increased (Fig 2B). Perturbation of skin  
161 microbiome also occurred within the same genus, for instance VACV infection resulted in a rise of  
162 relative abundance of *Staphylococcus aureus*, a well-known opportunist, over other species of  
163 *Staphylococcus* (S3B Fig). While averaged data visualised as stack plots cannot represent in full the  
164 observed microbiota shift, heatmaps (Fig 2C, S2A and S3C Figs) illustrate that the majority of d 8 and  
165 12 VACV-infected samples had very pronounced dominance of ~1-3 bacterial genera, which differs  
166 from normal microbiota. However, specific dominant taxa varied from sample to sample. Therefore,  
167 there is no particular type of bacterium that spread favourably after VACV infection. Instead, random  
168 different bacteria are increased in infected samples. Thus, VACV infection leads to changes in the skin  
169 microbiome and the expansion of opportunistic bacteria.

170

## 171 **Skin microbiota promote lesion development after VACV infection**

172 To investigate the influence of skin microbiota on lesion formation, a broad-spectrum bactericidal  
173 antibiotic (AB, ceftriaxone) was administered intraperitoneally (i.p.) over 13 d after VACV infection  
174 to suppress bacterial growth. C57BL/6 specific-pathogen-free (SPF) mice were infected i.d. with  
175 VACV, and one group received antibiotic treatment (SPF, AB-group), while another received  
176 phosphate-buffered saline (SPF, NoAB-group). Antibiotic treatment caused a significant reduction in  
177 lesion size after infection with VACV strain WR, a widely used laboratory strain of VACV (Fig 3A).  
178 A similar observation was made following infection with VACV strain Lister, a strain used widely for  
179 smallpox vaccination in humans (S4 Fig). To confirm that this effect was due to the presence of  
180 bacteria, rather than a non-specific consequence of antibiotic treatment, genetically-matched germ-free  
181 (GF) mice were infected i.d. with VACV strain WR. These mice showed delayed lesion formation and  
182 had a three-fold reduction in lesion size compared to SPF animals (Fig 3B).

183

184 Topical administration of antibiotic creams on the infected ears also resulted in a reduction of lesion  
185 size following VACV infection (S5 Fig). However, it was not possible to control the dose administered  
186 because the animals tend to groom themselves and each other, leading to ingestion of the applied  
187 creams. Antibiotic treatment can influence antiviral immunity when administered orally (26) and so to  
188 minimise the influence on gut microbiota, the antibiotic was administered i.p. for all our experiments.  
189 To avoid changes in microbiota prior to infection, antibiotic treatment was only started from d 1 p.i.  
190 Throughout ceftriaxone treatment, the health status of animals and their leukocyte composition in  
191 peripheral blood, spleen and bone marrow were unaltered (S6 Fig).

192



193 Next the virus titres in infected tissue with or without antibiotic treatment were determined. Notably,  
194 despite considerable differences in lesion size, the viral titres in infected ear tissues were unaltered (Fig  
195 3C). This indicated that: i) antibiotic treatment has no impact on virus replication, and ii) lesion size  
196 was influenced by the presence of bacteria rather than virus titre.

197

198 Histological examination of infected lesions showed that necrosis of the ear tissue in the NoAB-group  
199 of animals was substantially greater than in the AB-group (Fig 4A). A striking difference in histological  
200 changes after VACV infection was also observed when comparing GF and SPF mice: ears of the GF  
201 animals had significantly reduced cell infiltration and only very mild tissue necrosis (Fig 4B).

202 Collectively, these observations indicate that skin microbiota promote lesion development after VACV  
203 infection and the smaller lesion sizes and lack of pathological tissue changes in GF and antibiotic-  
204 treated groups were due to the absence of microbiota or antibiotic-induced suppression of bacterial  
205 expansion.

206

### 207 **Skin microbiota enhance immune cell recruitment and cytokine production**

208 Next, we compared the local immune response to VACV infection in ear tissue of antibiotic-treated  
209 and untreated SPF animals. Recruitment of immune cells was low on d 1-4 p.i. (Fig 5A) but there was  
210 a sharp increase of Ly6C<sup>+</sup> inflammatory monocytes on d 5, followed by large leukocyte infiltration at  
211 d 7. Notably, the antibiotic-treated group showed a substantial reduction in the recruitment of multiple  
212 subpopulations of myeloid and lymphoid cells at d 7 p.i. (Fig 5A). By d 12 p.i., several subpopulations  
213 of leukocytes had declined, except for neutrophils in the NoAB-group, which continued to increase.  
214 During infection there was a notable positive correlation between the lesion size and the numbers of  
215 infiltrating neutrophils or TCR $\alpha\beta$  T cells and this correlation did not hold for any other cell type (Fig  
216 5B).

217

218 To analyse the local inflammatory environment further, we measured an array of cytokines and  
219 chemokines in the ear tissue at d 5, 8 and 12 p.i. in control and antibiotic-treated mice. Consistent with  
220 the smaller lesions and reduction in cellular infiltration, among 17 different inflammatory mediators  
221 measured, there were reductions of IFN $\gamma$ , TNF $\alpha$ , CCL2, CCL4, CCL7, CXCL1 and CXCL10 levels in  
222 the antibiotic-treated group compared to controls at d 8, and also in the amount of CCL4 and CCL7 at  
223 d 12 p.i. (Fig 6A). Similar differences were also evident when comparing infected GF mice with SPF  
224 mice. Levels of IFN $\gamma$ , TNF $\alpha$ , CCL2, CCL7, CXCL1 and CXCL10 were considerably diminished in  
225 the GF mice (Fig 6B). These data indicate that the presence of skin microbiota accelerates overall  
226 immune cell recruitment and cytokine/chemokine production in VACV-infected skin.

227

### 228 **Humoral adaptive immune response is impaired in the absence of microbiota**

229 To assess the role of microbiota in the generation of VACV-specific adaptive immunity, we measured  
230 VACV-specific CD8<sup>+</sup> T cell numbers and anti-VACV neutralising antibodies in samples obtained from  
231 SPF groups, with or without antibiotic treatment, and GF mice one month after vaccination. Absolute  
232 numbers of splenic CD4<sup>+</sup> and CD8<sup>+</sup> T cells, as well as VACV-specific CD8<sup>+</sup> cells, were similar in all  
233 three groups of animals (Fig 7A, B). However, the levels of VACV neutralising antibodies were  
234 significantly lower in GF animals than in either group of SPF animals (Fig 7C). Despite the reduced  
235 antibody response in the vaccinated GF mice, all groups showed protection from disease upon  
236 intranasal challenge with a lethal dose of VACV (Fig 7D-F). Each SPF group showed a small (~10%)  
237 transient weight loss after challenge before recovery. These data indicate that the GF mice have an  
238 impaired capacity to generate neutralising antibody following i.d. vaccination with VACV, but that  
239 this does not affect their capacity to develop protective immunity against re-challenge in this model.

240 These data do not distinguish between the deficiency of antibody-dependent immunity in GF animals  
241 *per se* and the decline in humoral immune responses due to a lack of stimulatory signals from  
242 microbiota. We attempted to address this by comparing vaccination of GF and *S. aureus* gnotobiotic  
243 mice, which were generated by mono-colonisation of GF animals with *S. aureus* strain NCTC 8325  
244 two weeks prior to the i.d. vaccination with VACV. Unfortunately, mice reconstituted with *S. aureus*,  
245 differed from GF controls with lower body mass and reduced subcutaneous and visceral fat, possibly  
246 suggest ongoing inflammation after colonisation with *S. aureus*. For these reasons, *S. aureus* colonised  
247 animals proved unsuitable for comparison.

248

## 249 **Discussion**

250 Host microbiota influence many physiological and pathological processes throughout life, including  
251 pre- and postnatal development, aging, metabolism and immunity (27, 28). Commensal organisms play  
252 an important role in the defense against pathogens, not only by preventing microorganisms from  
253 colonising epithelial niches, but also by influencing homeostasis, maturation and regulation of the  
254 immune system (24, 29). During infection by bacteria or viruses, host microbiota may either promote  
255 or diminish pathology (30, 31) and the ability of commensals to influence inflammation via regulation  
256 of innate immune responses suggests that microbiota could be manipulated for host health benefit (24,  
257 29, 32).

258

259 This study reports a 1000-fold increase in local skin microbiota after i.d. vaccination with VACV (Fig  
260 1). This expanded bacterial load dominates the development of skin lesions following vaccination (Fig  
261 3, S5 Fig) and enhances the innate immune response by increasing leukocyte infiltration and local  
262 cytokine/chemokine (Figs 5, 6). Notably, in the absence of microbiota, antibody-mediated immunity  
263 is impaired while the antigen-specific CD8<sup>+</sup> T cell response is preserved (Fig 7).

264 Multiple factors provide skin barrier function and control microorganisms on the skin surface including  
265 acidic pH, high-salt, antimicrobial proteins (defensins, cathelicidins, peptidoglycan recognition  
266 proteins, ribonucleases and psoriasin), free fatty acids, ceramide and filaggrin (8, 33, 34). Keratinocytes  
267 and sebaceous glands, which synthesise these substances (35, 36), are highly susceptible to VACV  
268 infection (37). VACV-induced shut-off of host protein synthesis in infected cells (38) may diminish  
269 production of antimicrobial substances and therefore induce changes in local microbiota. Here, VACV  
270 infection is shown to induce large changes in skin microbiota, especially later after infection (Fig 2, S2  
271 and S3 Figs), with changing dominance of different bacterial taxa. These dominant taxa varied between  
272 infected animals, indicating colonisation by random opportunistic bacteria, a common feature for  
273 secondary bacterial infections (39).

274

275 The ability of bacterial commensals to rapidly expand has been demonstrated previously; for instance,  
276 the doubling time of *S. aureus* in human nasal cavity is 2-4 h (40), which suggests a bacterial increase  
277 of 60-2000-fold in 24 h is possible (not accounting for bacterial death and assuming sufficient nutrient  
278 availability). The bacterial growth rate in a host organism depends on multiple factors including  
279 immune status of the host. During experimental sepsis the speed of bacterial expansion can be more  
280 than 100-fold per 24 h, when the immune system loses control of the infection (41). Here we observed  
281 up to 100-fold increase of bacterial presence within the first 24 h post VACV-infection (Fig 1C and  
282 D), which can be explained by the fact that VACV is a very potent suppressor of the local innate  
283 immune response (5). Further bacterial expansion over two weeks post i.d. VACV infection was only  
284 10-fold (Fig 1C and D) possibly slowing down due to nutrient limitations and, after 5 dpi, the activation  
285 of the immune system and leukocyte infiltration (Fig 5, Fig 6), which limits bacterial growth and  
286 increases their death.

287

288 Although increased bacterial, but not viral, load correlated with enhanced lesion size, these increased  
289 bacteria were not sufficient for lesion formation, because bacteria increased 1-5 d p.i., before lesions  
290 appeared on d 6 (Figs 1C, D and 3A, B). Furthermore, GF mice still developed lesions, although these  
291 were delayed and diminished (Fig 3B). Lesion size was also reduced in GF animals following dermal  
292 scarification of VACV into the mouse tail (42). VACV infection may disrupt skin integrity due to  
293 VACV-induced cytopathic effect (43) or cell motility (44) that enabled bacteria to enter tissue and  
294 proliferate. Local immunosuppression induced by VACV proteins that block innate immunity (4, 5)  
295 including production of glucocorticoids by a VACV-encoded steroid biosynthetic enzyme (45, 46)  
296 might facilitate further bacterial growth. Notably, a VACV strain lacking this enzyme induced smaller  
297 dermal lesions (22). In the future, it would be interesting to measure microbiota after infection by this  
298 and other VACV mutants lacking specific immunomodulators.

299  
300 These observations with VACV have similarity to those made with the trypanosome *Leishmania major*  
301 in which skin lesions were smaller in GF mice than SPF mice (24). That study also demonstrated the  
302 importance of the skin resident immune system in the progression of inflammation (24). Inflammation  
303 after exposure to pathogens can be caused and/or aggravated by opportunistic commensals (25).  
304 Bacterial invasion provides potent activators of innate immunity that promote cytokine/chemokine  
305 production and immune cell recruitment (47). Consistent with this, larger lesions were associated with  
306 more neutrophils and T cells (Fig 5B), and increased tissue cytokines and chemokines (Fig 6).  
307 Interestingly, depletion of Ly6G<sup>+</sup> cells results in delayed lesion healing post epicutaneous infection  
308 with VACV (37), consistent with the involvement of neutrophils in bacterial clearance and the  
309 resolution of inflammation. However, whether bacterial infection *per se* (48) or immune system  
310 activation by bacteria (49) induce tissue damage is unknown. During SARS-CoV-2 infection, increased  
311 neutrophil counts correlate with severe pathology and hyper-inflammation. Specifically, neutrophils  
312 are elevated in the second week from the onset of symptoms and are higher in severe COVID-19 in

313 comparison with moderate disease (50-53). Similarly, the presence of neutrophils predisposes to  
314 enhanced respiratory syncytial virus infection (54). In our study, the massive recruitment of immune  
315 cells in infected tissue coincided with the appearance of the skin lesion. Therefore, three factors may  
316 influence lesion development after i.d. vaccination with VACV: 1) virus-induced tissue damage, 2)  
317 tissue destruction by invading bacteria, and 3) immunopathology. Lesion size in this i.d. model is also  
318 influenced by the age and strain of mice, and strain of VACV (22).

319  
320 Bacterial lipopolysaccharides, flagellin, DNA and toxins are used as adjuvants to stimulate innate  
321 immunity and vaccine immunogenicity, mainly via enhanced antibody production (17). Consistent  
322 with that, the innate immune response to vaccination of GF mice was lower than for genetically-  
323 matched SPF animals (Fig 6B), and whereas VACV-specific CD8<sup>+</sup> T cell memory did not depend on  
324 microbiota, the humoral immune response was impaired in GF mice compared with SPF animals (Fig  
325 7A-C). Nonetheless, no reduction of anti-VACV antibodies in antibiotic-treated SPF animals was seen  
326 (Fig 7C), despite reduced cytokine/chemokine levels. This maybe because antibiotic treatment does  
327 not eliminate bacteria, but limits their growth and spread. Others also reported reduced antibody  
328 responses in both GF and antibiotic-treated animals (55, 56). However, these studies used animals  
329 pretreated with antibiotic *per os* to induce alterations in the gut microbiome, while we administrated  
330 antibiotics i.p. only from 1 d after infection by VACV. Previous studies suggested that the influence  
331 of microbiota on T-cell memory may depend on the inoculation route or pathogen (55). Notably, the  
332 induction of CD8<sup>+</sup> T cell memory following i.d. vaccination with VACV is microbiota-independent  
333 and not perturbed by the presence of bacteria in the skin, gut or elsewhere (Fig 7).

334  
335 Although VACV-specific memory CD8<sup>+</sup> T cells may have functional differences in the absence of  
336 microbiota (57), and despite reduced titres of VACV-specific neutralising antibodies, GF animals were  
337 protected as well as SPF mice from i.n. challenge with VACV one month (Fig 7D-F). SPF mice that

338 had been treated with antibiotic were also protected as well as control mice at 3 months after  
339 vaccination (S7 Fig). This reflects the solid immunity induced by vaccination in all groups and  
340 consequential resistance to challenge with a high dose of VACV. These conditions might not be  
341 suitable to reveal subtle differences in protection between the groups used. Lower immunising doses  
342 or longer duration between vaccination and challenge might show differences. Nonetheless, this study  
343 illustrates the influence of skin microbiota for the generation of anti-VACV antibodies and this  
344 observation is important for vaccine development.

345

346 In conclusion, this study demonstrates that i.d. vaccination with VACV induces substantial local  
347 bacterial infection derived from skin microbiota, which function as adjuvant to increase the innate  
348 immune response leading to greater skin inflammation. The enhanced bacteria induced formation of  
349 larger dermal lesions either by direct bacterial-induced cytotoxicity or immunopathology. Vaccination  
350 with VACV generates robust long lasting immune responses that eradicated smallpox from man (1)  
351 and can protect mice from lethal challenge (21, 58). As shown here, such protective immunity does not  
352 require additional stimuli from microbiota or other adjuvants. However, further activation of the innate  
353 immune system provided by skin microbiota might have a beneficial effect on the immunogenicity of  
354 other vaccines.

355

## 356 **Materials and Methods**

### 357 **Animals and study design – ethics statement**

358 C57BL/6 female mice were used in all experiments of this study. Specific pathogen free (SPF) animals  
359 were purchased from Charles River and housed under SPF conditions in the Cambridge University  
360 Biomedical Services facility. Germ-free (GF) C57BL/6 mice were bred and kept at the University of  
361 Bern GF animal facility. All GF mice were confirmed to be microbial-free during breeding and during

362 experiments using culture dependent and independent strategies. Animal experiments in the UK were  
363 conducted according to the Animals (Scientific Procedures) Act 1986 under PPL 70/8524 issued by  
364 the UK Home Office. Experiments involving GF animals were performed in accordance with Swiss  
365 Federal and Cantonal regulations.

366

367 SPF mice (7 weeks old) or GF mice (7-9-weeks old) were injected intradermally (i.d.) with  $10^4$  plaque-  
368 forming units (PFU) of VACV strain Western Reserve (WR) or strain Lister or diluent (0.01%  
369 BSA/PBS, mock-control) into both ear pinnae. VACV used for infections was purified from infected  
370 cells in sterile conditions by sedimentation through a 36% (w/v) sucrose cushion and subsequently  
371 through a 15-40% (w/v) sucrose density gradient. When plated onto sheep blood agar these VACV  
372 preparations induced no bacterial growth. VACV titres were measured by plaque assay on BSC-1 cells  
373 and stored at  $-70\text{ }^{\circ}\text{C}$ . The diluted VACV samples used for injections were titrated to confirm the  
374 accuracy of the injected dose.

375

376 Some groups of animals were injected intraperitoneally (i.p.) with antibiotic or PBS for up to 13 d  
377 starting 1 d after i.d. infection with VACV. Ceftriaxone (Rocephin; Roche, Basel, Switzerland), a third-  
378 generation cephalosporin antibiotic with a broad spectrum antibacterial activity, was given at 10 mg /  
379 mouse / d.

380

381 The size of lesions formed after i.d. injection of VACV into the ear pinnae were measured daily with  
382 a digital calliper. Whole ear pinnae tissues were collected before and at several times after infection.  
383 and spleens and serum samples were obtained one month p.i. to quantify T cell subpopulations and  
384 VACV neutralising antibodies. Vaccinated mice and naïve controls were challenged i.n. with  $3 \times 10^6$   
385 PFU of VACV WR 1 month post vaccination. The body weight of animals was measured daily.

386



## 387 **Flow cytometry**

388 The composition of immune cells in VACV-infected ear tissues was determined by FACS as described  
389 (58). Dead cells were excluded by addition of Zombie Fixable Viability dye (S2 Table) for 20 min  
390 followed by washing. After pre-incubation of samples with purified rat anti-mouse CD16/CD32  
391 antibody (Mouse BD Fc Block) (BD Biosciences, Cat. # 553141, Franklin Lakes, New Jersey),  
392 monoclonal antibodies (mAbs) were added to the cell suspension (S2 Table). The following mAbs  
393 were included in the myeloid panel: anti-CD45, Siglec-F, CD11c, CD11b, Ly6C, Ly6G, as well as  
394 dump channel markers (CD3, CD5, CD19, NK1.1). The lymphoid panel included CD45, NK1.1, CD3,  
395 TCR $\gamma\delta$ , CD4, CD8 markers. After final washing steps, cells were resuspended in PBS containing 4%  
396 paraformaldehyde (PFA) and were analysed on a BD LSRFortessa (BD Biosciences). Gating strategies  
397 are shown in S8 and S9 Figs. FACS analysis were completed using BD FACS Diva (BD Biosciences)  
398 and FlowJo (FlowJo, LLC BD, Ashland, Oregon) software.

399

400 Splenocyte isolation and staining for FACS analysis were performed as described (58). Subpopulations  
401 of splenic T cells were determined by staining with mAbs to CD45, CD3, CD8, CD4 and MHC  
402 dextramer H- 2Kb/TSYKFESV (S2 Table). Gating strategy is shown in S10 Fig.

403

## 404 **Measurement of cytokines and chemokines in ear tissue**

405 Whole ear pinnae were homogenised in 1.5 ml flat-bottom tubes containing 400  $\mu$ l of 0.01% BSA/PBS  
406 with an OMNI Tissue Homogeniser with plastic hard-tissue probes (OMNI International, Kennesaw,  
407 GA, Georgia). The homogenate was then centrifuged at 10,000 rcf for 20 min at 4 °C and the  
408 supernatant was collected and stored at -80 °C. The levels of IFN $\gamma$ , TNF $\alpha$ , IL-1 $\beta$ , IL-4, IL-6, IL-10,  
409 IL-33, CCL2, CCL3, CCL4, CCL5, CCL7, CCL20, CXCL1, CXCL2, CXCL5 and CXCL10 were

410 measured using Magnetic Luminex Mouse Premixed Multi-Analyte kits (R&D Systems, Minneapolis,  
411 Minnesota) and a Luminex 200 analyser (Luminex Corporation, Austin, Texas).

412

### 413 **Bacterial colony count**

414 Whole ear pinnae homogenates were diluted in 10-fold steps in LB medium and 10 µl of undiluted and  
415 diluted samples were pipetted onto sheep blood agar plates (Columbia Agar with sheep blood Plates;  
416 Oxoid, Cat. # PB0123A, Thermo Fisher Scientific, Waltham, Massachusetts). After incubation for 18  
417 h at 37 °C, colony-forming units (CFU) were counted. The limit of detection was 40 CFU/ear.

418

### 419 **Viral titres measurement in ear tissues**

420 Whole ears homogenates underwent 3 cycles of freezing-thawing-sonicating to rupture cells and  
421 release the virus. Titres of infectious virus were then determined by plaque assay on BSC-1 cell  
422 monolayers.

423

### 424 **Histology**

425 Ear pinnae were collected at 8 and 12 d p.i. with VACV strain Western Reserve (WR), fixed in 4%  
426 PFA/PBS for 24 h at 4 °C and then stored in 70% ethanol at 4 °C until paraffin embedding. Transverse  
427 sections (6 µm) through the middle of the lesion were stained with haematoxylin and eosin (H&E) and  
428 were examined under an AxioObserver Z1 microscope with an AxioCam HRc camera (Carl Zeiss AG)  
429 using Axiovision software (Carl Zeiss AG).

430

### 431 **Sample preparation for 16S rRNA gene sequencing**

432 Whole ear tissues were collected before infection and at 2, 5, 8 and 12 d post i.d. injection with 10<sup>4</sup>  
433 PFU of VACV WR. Mock-infected samples from mice injected with a sterile diluent (0.01%

434 BSA/PBS) were obtained at d 8 post injection. Whole ear tissues were homogenised in sterile 1.5 ml  
435 flat-bottom tubes containing 400 µl of PowerBead Solution (Part of DNeasy UltraClean Microbial Kit;  
436 Qiagen, Cat #12224-250, Hilden, Germany) with an OMNI Tissue Homogeniser with plastic hard-  
437 tissue probes (OMNI International). Samples were stored at -80 °C until use. After thawing, 300 µl of  
438 homogenates were transferred to PowerBead tubes (Part of DNeasy UltraClean Microbial Kit, Qiagen,  
439 Cat #12224-250) and 50 µl of SL solution (Part of DNeasy UltraClean Microbial Kit; Qiagen, Cat  
440 #12224-250) was added. The samples then underwent mechanical disruption by rapid agitation with  
441 beads using a Fastprep 24-5G bead beater (MP Biomedicals, Fisher Scientific, Irvine, California), 2  
442 cycles of 40 sec at 6 ms<sup>-1</sup>. DNA precipitations were completed with a MasterPure Gram Positive DNA  
443 Purification kit (Epicentre, Illumina, Cat # MGP04100, Madison, Wisconsin) according to its  
444 instruction manual.

445

446 Ear tissue collection and DNA extraction was performed in sterile conditions with single-use  
447 instruments and consumables to avoid contamination with bacteria or bacterial DNA. Blank samples  
448 containing buffers with no tissue specimens were used as controls for contamination and were treated  
449 exactly as ear tissue samples. Blank controls were made for each batch corresponding to the day of  
450 tissue collection.

451

452 DNA samples were diluted with nuclease free water (Ambion, Cat # AM9935, Austin, Texas) to  
453 normalise DNA concentrations to ~90 ng/µl. The NEXTflex 16S V4 Amplicon-Seq Kit 2.0 (Bio  
454 Scientific, PerkinElmer, Waltham, Massachusetts) was used for the bacterial 16S library preparation  
455 according to the manufacturer's instructions with the exception that 150 ng of material was used for  
456 amplification with 11 and 22 PCR cycles for the first and second rounds of amplifications, respectively.  
457 Kapa Pure beads (KappaBiosystems, Cat # KK8002, Roche) were applied for purification and size  
458 selection of DNA with a volumetric ratio of 0.6X-0.8X. The final library was assessed by D1000

459 ScreenTape assay (Tapestation Agilent; Agilent Technologies, Santa Clara, California) for quality and  
460 fragment size, then quantified by Qubit dsDNA High Sensitivity Assay kit (Invitrogen, Thermo Fisher  
461 Scientific, Cat. # Q32854) and pooled to 10 nM. The final pool was quantified by qPCR with Kapa  
462 Library Quant Kit for Illumina Platforms (KapaBiosystems, Roche, Cat. # KK4824) on an AriaMX  
463 Real Time PCR System (Agilent Technologies). Next generation sequencing was performed by paired-  
464 end sequencing of the V4 region using MiSeq Reagent Kit version 3, 600-cycle format (Illumina).  
465 Library preparation and sequencing were completed by Cambridge Genomic Services. Data have been  
466 deposited to the European Nucleotide Archive. Processing and analysis of 16S sequence data is  
467 described in S1 Methods.

468

## 469 **Statistical and visual analysis of the microbiome data**

470 **Heatmap analysis.** The heatmap was created using all samples with the R package Heatplus version  
471 2.28.0. (S1 Methods). Taxon was selected if it was present in at least 5 samples with a minimum  
472 abundance of 1%. Five clusters were identified by specifying the “cuth” parameter (see S1 Methods).  
473 The heatmaps show 50 families from the family taxon datasets, 61 genera from the genus taxon  
474 datasets, and 72 species from the species taxon datasets.

475

476 **Principal component analysis (PCA).** For the visualisation of microbial compositional differences  
477 between the different sample groups/timepoints we plotted the microbial variances using a multivariate  
478 method called Principal Component Analysis (PCA) for the family, genus, and species taxon level  
479 using the mixOmics R package version 6.7.1 (59). PCA was conducted including all taxon with a  
480 minimum abundance of 0.1%.

481

## 482 **Other statistical analysis**

483 Statistical analysis was performed with SPSS v.25 (IBM, Armonk, New York) and GraphPad Prism  
484 v.8.3 (GraphPad Software, San Diego, California). Comparison between two groups of animals were  
485 done by Mann-Whitney U-test. The two-way repeated measures (RM) ANOVA test was used for the  
486 analysis of time series data. Correlations between parameters were assessed using Spearman  
487 correlation coefficient. P values of less than 0.05 were considered significant.

488

## 489 **Data deposit**

490 Sequence data were deposited at the European Nucleotide Archive (ENA) at the European  
491 Bioinformatics Institute and will be released upon publication of this article. Accession number  
492 PRJEB39345; Study: PRJEB39345 ena-STUDY-Department of Pathology-12-07-2020-12:22:02:769-  
493 1371. The other datasets are available on an online open access repository, Figshare.  
494 DOI: 10.6084/m9.figshare.14995416

495

## 496 **Acknowledgements**

497 We thank Gillian M. Fraser (Department of Pathology, University of Cambridge) and Stephen D. Bentley  
498 (Sanger Institute, Hinxton) for advice on bacteriological aspects of this study.

499

## 500 **Figure Legends**

### 501 **Fig 1. Skin microbiota expand after VACV infection.**

502 C57BL/6 SPF mice were injected i.d. with  $10^4$  PFU of VACV strain WR or PBS (mock) and ear tissues  
503 were then collected at different times post injection. (A) Absolute numbers of different myeloid cells  
504 present in ear tissues at d 9 p.i. ( $n=5$  per time point). DC & M $\Phi$ : dendritic cells and macrophages; ; Eosin:  
505 eosinophils; Mon: monocytes; Neutr: neutrophils. Medians are shown. (B) Absolute numbers of  
506 neutrophils infiltrating ear tissues at different times p.i. Mock: mock-control, 5 d post intradermal injection

507 of PBS ( $n=3-5$  per time point). Medians are shown. (C) Bacterial colonies grown from homogenised ear  
508 tissues and their 10-fold serial dilutions seeded on blood agar. (D) Bacteria colony-forming unit (CFU)  
509 counts of ear samples ( $n=3$ ). Means and SEM are shown. The experiments were performed at least twice  
510 and representative data from one experiment are shown.

511

512 **Fig 2. Skin microbiome change after i.d. infection with VACV.**

513 Ear tissues were collected from SPF mice before (intact) and at 2, 5, 8 and 12 d p.i. with  $10^4$  PFU of  
514 VACV and at d 8 post PBS injection (mock),  $n = 15$  per group per time point. Next generation  
515 sequencing was performed for DNA samples extracted from tissue. (A) Principal Component Analysis  
516 (PCA) of microbiome of genus taxon. PCA was conducted including all taxon with a minimum  
517 abundance of 0.1%. Ellipses represent a 40% confidence interval around the cluster centroid. (B)  
518 Relative abundance of most prevalent taxa of bacterial genera. (C) Heatmap of bacterial genera with  
519 hierarchical clustering. Bacterial genera with a minimum abundance of 1% in at least five samples was  
520 used for creation of the heat map. Five clusters are colour-coded with red, blue, green, violet and  
521 orange. “D” – day post injection.

522

523 **Fig 3. Skin microbiota promote lesion development after VACV infection.**

524 Specific pathogen free (SPF) or germ-free (GF) mice ( $n=5-15$  per group) were injected intradermally with  
525  $10^4$  PFU of VACV. SPF, AB animals received antibiotic i.p. from 1 d p.i.; SPF, NoAB animals received  
526 i.p. injections with PBS. (A-B) Ear lesion sizes of AB and NoAB-groups (A) or GF or SPF mice (B). Means  
527 and SEM are shown. Statistical analysis by two-way RM ANOVA test. (C) VACV titres in ear tissue p.i.  
528 PFU, plaque-forming units. NS – non-significant by Mann-Whitney test. Experiments (except for those  
529 with GF mice) were performed at least twice and representative data from one experiment are shown. The  
530 experiments with GF mice were performed once.

531

532 **Fig 4. Histology of ear lesions after VACV infection.**

533 Specific pathogen free (SPF) or germ-free (GF) mice ( $n=5-15$  per group) were injected i.d. with  $10^4$   
534 PFU of VACV WR. Group SPF AB was injected daily i.p. with antibiotic ceftriaxone from d 1 to 11  
535 p.i. Group SPF NoAB received i.p. injections with PBS. (A) Images of haematoxylin and eosin (H&E)  
536 stained transverse ear sections 8 and 12 d p.i. Bars = 300  $\mu\text{m}$ . (B) Images of H&E stained transverse  
537 ear sections collected from GF mice 10 d p.i. Bars = 300  $\mu\text{m}$ .

538

539 **Fig 5. Skin microbiota advance immune cell recruitment into VACV infected tissue.**

540 Two groups of SPF mice were infected i.d. with  $10^4$  PFU of VACV. From d 1 p.i. onwards, one group  
541 (AB) received antibiotic (ceftriaxone) i.p. daily. The second group (NoAB) received PBS i.p. (A)  
542 Numbers of myeloid and lymphoid cell of subpopulations were measured in ear tissues at 2, 5, 7 and  
543 12 d p.i. ( $n=5$  per group per time point). DC & M $\Phi$ , dendritic cells and macrophages; Mon, monocytes,  
544 TCR $\gamma\delta$ , TCR $\gamma\delta^+$  T cells; TCR $\alpha\beta$  CD4, TCR $\gamma\delta$ -CD4 $^+$  T cells; TCR $\alpha\beta$  CD8, TCR $\gamma\delta$ -CD8 $^+$  T cells. Box  
545 plots are shown; p values were determined by the Mann-Whitney test, \* =  $p<0.05$ , \*\* =  $p<0.01$ . (B)  
546 Spearman correlation analysis of lesion sizes versus numbers of neutrophils, Ly6C $^+$ monocytes, TCR $\gamma\delta$   
547 T cells or TCR $\alpha\beta$  (TCR $\gamma\delta^-$ ) T cells recruited to site of infection. The experiment was performed twice  
548 and representative data from one experiment are shown.

549

550 **Fig 6. Skin microbiota promote the production of cytokines/chemokines in VACV-infected ear tissue.**

551 SPF or GF mice ( $n=5-7$  per group per time point) were injected i.d. with  $10^4$  PFU of VACV. SPF, AB-  
552 group received antibiotic (ceftriaxone) i.p. daily from 1 d p.i.; SPF, NoAB group received i.p. injections  
553 with PBS. (A) Tissue levels of cytokines and chemokines were measured by multiplex assay (Luminex).  
554 Data are shown as the fold change from the baseline (untreated intact ear samples). Means are shown. The  
555 experiment was performed twice and data from one representative experiment are shown. (B) Tissue levels  
556 of cytokines and chemokines in GF and SPF groups at d 10 p.i. measured by multiplex assay (Luminex).

557 Graphs show results two independent experiments. Dotted lines indicate the lowest standards (or highest  
558 standard for CCL7). The experiment with GF animals was performed once.

559

560 **Fig 7. VACV-specific antibody and CD8<sup>+</sup> T cell memory response and virus challenge of vaccinated**  
561 **mice.**

562 (A-C): SPF or GF mice ( $n=5$ ) were injected i.d. with  $10^4$  PFU of VACV. SPF, AB-group received i.p.  
563 antibiotic treatment for 10 d from 1 d p.i. SPF, NoAB group received i.p. injections with PBS. Splens and  
564 serum samples were obtained at 34 d p.i. (A) Absolute number of splenic CD8<sup>+</sup> and CD4<sup>+</sup> T cells. Bars  
565 represent means. (B) Absolute number of VACV-specific splenic CD8<sup>+</sup> T cells. Bars represent means. (C)  
566 VACV-neutralising antibody responses determined by plaque-reduction neutralisation test. IC50, half  
567 maximal inhibitory concentration. Bars represent means. All experiments (except with GF mice) were  
568 performed twice and representative data from one experiment are shown. The experiments with GF mice  
569 were performed once. (D-F): GF and SPF groups of mice ( $n=5$  per group) were vaccinated (“vac”) i.d. in  
570 both ears with  $10^4$  PFU of VACV WR per ear. “Naive” groups ( $n=3-5$ ) were not vaccinated. AB and NoAB  
571 groups were treated as in (A-C). One month p.i. groups were challenged i.n. with (D, E)  $3 \times 10^6$  PFU or (F)  
572  $6 \times 10^6$  PFU of VACV WR. Data represent the weight of each mouse compared to the weight of the same  
573 animal before challenge (d 0). The percentages for each group are means with SEM.

574

575 **Supporting information**

576 **S1 Fig. Morphology of Ly6G<sup>+</sup> cells in VACV-infected ear tissue.**

577 C57BL/6 SPF mice were injected i.d. in the ear pinnae with  $10^4$  PFU of VACV WR. Images of sorted  
578 neutrophils (Zombie violet, CD3<sup>-</sup>, CD5<sup>-</sup>, CD19<sup>-</sup>, NK1.1<sup>-</sup>, CD11c<sup>-</sup>CD45<sup>+</sup>Siglec-F<sup>-</sup>Ly6G<sup>+</sup>) extracted from  
579 ear tissues at 9 d p.i. Red - signal from surface staining with mix of antibodies, blue - DAPI. Bars = 5  $\mu$ m.

580



581 **S2 Fig. Skin microbiome change after i.d. infection with VACV (Family).**

582 Ear tissues were collected from SPF mice before (intact) and at 2, 5, 8 and 12 d p.i. with  $10^4$  PFU of VACV  
583 WR and at d 8 post injection of PBS (mock),  $n = 15$  per group per time point. Next generation sequencing  
584 was performed on DNA extracted from the ear tissues. (A) Heatmap of bacterial families with hierarchical  
585 clustering. Bacterial families with a minimum abundance of 1% in at least five samples was used for  
586 creation of the heat map. Five clusters are colour coded with red, blue, green, violet and orange. (B) Results  
587 of Principal Component Analysis (PCA) of ear tissue microbiome of family taxon. PCA was conducted  
588 including all taxon with a minimum abundance of 0.1%. Ellipses represent a 40% confidence interval  
589 around the cluster centroid. “D” – day post i.d. injection.

590

591 **S3 Fig. Skin microbiome change after i.d. infection with VACV (Species).**

592 Ear tissues were collected from SPF mice before (intact) and at 2, 5, 8 and 12 d p.i. with  $10^4$  PFU of VACV  
593 WR and at d 8 after injection of PBS (mock),  $n = 15$  per group per time point. Next generation sequencing  
594 was performed on DNA extracted from the ear tissues. (A) Results of Principal Component Analysis (PCA)  
595 of ear tissue microbiome of specie taxon. PCA was conducted including all taxon with a minimum  
596 abundance of 0.1%. Ellipses represent a 40% confidence interval around the cluster centroid. (B) Relative  
597 abundance of most prevalent taxa of ear tissue bacterial species. (C) Heatmap of bacterial species with  
598 hierarchical clustering. Bacterial species with a minimum abundance of 1% in at least five samples was  
599 used for creation of the heat map. Five clusters are colour coded with red, blue, green, violet and orange.  
600 “D” – day post i.d. injection.

601

602 **S4 Fig. Dermal lesion sizes after antibiotic treatment of animals infected with VACV strain Lister.**

603 Groups of C57BL/6 SPF mice ( $n=5$  per group) were injected i.d. with  $10^6$  PFU of VACV strain Lister.  
604 Group AB were injected i.p. with antibiotic ceftriaxone daily from d 1 to 11 p.i. Group NoAB received i.p.

605 injections with PBS. Data show the mean lesion size +/- SEM. Statistical analysis by two-way RM ANOVA  
606 test,  $p=0.018$ .

607

608 **S5 Fig. Dermal lesion sizes after antibiotic cream treatment of animals infected with VACV.**

609 Groups of C57BL/6 SPF mice ( $n=3-5$  per group) were injected i.d. with  $10^4$  PFU of VACV strain WR. The  
610 first group received topical administration with 3% tetracycline cream on infected ears daily from d 5 to 21  
611 p.i. The second group received topical administration with 4% erythromycin cream on infected ears daily  
612 from d 5 to 21 p.i. Group NoAB received topical application of neat vaseline. Data show the mean lesion  
613 size +/- SEM. Statistical analysis by two-way RM ANOVA test.

614

615 **S6 Fig. Antibiotic treatment does not influence leukocyte composition of blood, spleen and bone  
616 marrow.**

617 C57BL/6 SPF mice received i.p. injections with antibiotic (ceftriaxone) or PBS for 10 d, then numbers of  
618 different subpopulations of myeloid and lymphoid cells were measured in blood (A), spleen (B) and bone  
619 marrow (C) ( $n=5$  per group). DC & M $\Phi$ , dendritic cells and macrophages; Mon, monocytes, TCR $\gamma\delta$ ,  
620 TCR $\gamma\delta^+$  T cells; TCR $\alpha\beta$  CD4, TCR $\gamma\delta$ -CD4 $^+$  T cells; TCR $\alpha\beta$  CD8, TCR $\gamma\delta$ -CD8 $^+$  T cells. Box plots are  
621 shown.

622

623 **S7 Fig. VACV-specific antibody and CD8 $^+$  T cell memory response and virus challenge of mice 3.5  
624 months post vaccination.**

625 (A-C): SPF or GF mice ( $n=5$ ) were injected i.d. with  $10^4$  PFU of VACV. SPF, AB-group received i.p.  
626 antibiotic treatment for 10 d from 1 d p.i. SPF, NoAB group received i.p. injections with PBS. Spleens and  
627 serum samples were obtained at 3.5 months p.i. (A) Absolute number of splenic CD8 $^+$  and CD4 $^+$  T cells.  
628 Bars represent means. (B) Absolute number of VACV-specific splenic CD8 $^+$  T cells. Bars represent means.  
629 (C) VACV-neutralising antibody responses determined by plaque-reduction neutralisation test. IC $_{50}$ , half

630 maximal inhibitory concentration. Bars represent means. (D): SPF mice were vaccinated i.d. in both ears  
631 with  $10^4$  PFU of VACV WR per ear. AB and NoAB groups ( $n=5$  per group) were treated as in (A-C). At  
632 3.5 months p.i. groups were challenged i.n. with  $10^7$  PFU of VACV WR. Data represent the weight of each  
633 mouse compared to the weight of the same animal before challenge (d 0). The percentages for each group  
634 are means with SEM.

635

636 **S8 Fig. Gating strategy for flow cytometry of myeloid lineage cells present in ear tissue 7 d after i.d.**  
637 **injection of SPF mice with  $10^4$  PFU of VACV WR.**

638 Cells were gated on their ability to scatter light. Doublets were excluded using a FSC-A versus FSC-H plot.  
639 The myeloid gate included  $CD45^+Zombie\ dye^-CD3^-CD5^-CD19^-NK1.1^-$  cells. Further myeloid cell  
640 subpopulations were classified as follows: Eosinophils:  $CD45^+CD3^-CD5^-CD19^-NK1.1^-CD11c^-Siglec-F^+$ ;  
641 DC and  $M\Phi$  (dendritic cells and macrophages):  $CD45^+CD3^-CD5^-CD19^-NK1.1^-Siglec-F^-CD11c^+$ ;  
642 Neutrophils:  $CD45^+CD3^-CD5^-CD19^-NK1.1^-CD11c^-Siglec-F^-Ly6G^+$ ;  $Ly6C^+Mon$  (inflammatory  
643 monocytes):  $CD45^+CD3^-CD5^-CD19^-NK1.1^-CD11c^-Siglec-F^-Ly6G^-CD11b^+Ly6C^+$ ;  $Ly6C^-Mon$   
644 (residential monocytes):  $CD45^+CD3^-CD5^-CD19^-NK1.1^-CD11c^-Siglec-F^-Ly6G^-CD11b^+Ly6C^-$ .

645

646 **S9 Fig. Gating strategy for flow cytometry of lymphoid lineage cells present in ear tissue 7 d after i.d.**  
647 **injection of SPF mice with  $10^4$  PFU of VACV WR.**

648 Cells were gated on their ability to scatter light. Doublets were excluded using a FSC-A versus FSC-H plot.  
649 Then, hemopoietic cells were gated as  $CD45^+Zombie\ dye^-$  cells. Further lymphoid subpopulations were  
650 classified as follows: NK cells:  $CD45^+CD3^-NK1.1^+$ ;  $TCR\gamma\delta$  T cells:  $CD45^+CD3^+NK1.1^-TCR\gamma\delta^+$ ; CD4 T  
651 cells:  $CD45^+CD3^+NK1.1^-TCR\gamma\delta^-CD8^-CD4^+$ ; CD8 T cells:  $CD45^+CD3^+NK1.1^-TCR\gamma\delta^-CD4^-CD8^+$ .

652

653 **S10 Fig. Gating strategy for flow cytometry of splenic  $CD8^+$  and  $CD4^+$  T cells isolated one month**  
654 **after i.d. injection of ear pinnae with  $10^4$  PFU of VACV WR, or from mock-infected animals. Cells**

655 were gated on their ability to scatter light. Doublets were excluded using a FSC-A versus FSC-H plot. T  
656 cells were classified as CD45<sup>+</sup>Zombie dye<sup>-</sup>CD3<sup>+</sup> cells and then divided into CD8<sup>+</sup> and CD4<sup>+</sup> T subsets and  
657 with further gating of VACV-specific CD8<sup>+</sup> T lymphocytes (CD45<sup>+</sup>CD3<sup>+</sup>CD4<sup>-</sup>CD8<sup>+</sup>Dextramer<sup>+</sup>).

658

659 **S1 Table. Variation in bacterial composition (beta diversity) among groups of samples at different**  
660 **times p.i. as well as mock and intact ear specimens by PERMANOVA test with and without**  
661 **Bonferroni correction.**

662

663 **S2 Table. Monoclonal antibodies and dyes used for staining cells prior to analysis by flow cytometry.**

664

## 665 **References**

- 666 1. Fenner F, Henderson DA, Arita I, Jezek Z, Ladnyi ID. Smallpox and its eradication.  
667 Geneva 1988.
- 668 2. Lane JM, Ruben FL, Neff JM, Millar JD. Complications of smallpox vaccination, 1968.  
669 National surveillance in the United States. *N Engl J Med.* 1969;281(22):1201-8.
- 670 3. Moss B. Smallpox vaccines: targets of protective immunity. *Immunol Rev.* 2011;239(1):8-26.
- 671 4. Smith GL, Benfield CTO, Maluquer de Motes C, Mazzon M, Ember SWJ, Ferguson BJ, et al.  
672 Vaccinia virus immune evasion: mechanisms, virulence and immunogenicity. *J Gen Virol.*  
673 2013;94:2367-92.
- 674 5. Albarnaz JD, Torres AA, Smith GL. Modulating vaccinia virus immunomodulators to  
675 improve immunological memory. *Viruses.* 2018;10(3).
- 676 6. Morris DE, Cleary DW, Clarke SC. Secondary bacterial infections associated with influenza  
677 pandemics. *Front Microbiol.* 2017;8:1041.
- 678 7. Cogen AL, Nizet V, Gallo RL. Skin microbiota: a source of disease or defence? *Br J*  
679 *Dermatol.* 2008;158(3):442-55.
- 680 8. Chen YE, Fischbach MA, Belkaid Y. Skin microbiota-host interactions. *Nature.*  
681 2018;553(7689):427-36.
- 682 9. Jerry C, Rech RR, Franca MS. What is your diagnosis? *Journal of Avian Medicine and*  
683 *Surgery.* 2015;29(3):261-4.
- 684 10. Pahlitzsch R, Hammarin AL, Widell A. A case of facial cellulitis and necrotizing  
685 lymphadenitis due to cowpox virus infection. *Clin Infect Dis.* 2006;43(6):737-42.
- 686 11. Nagata N, Saijo M, Kataoka M, Ami Y, Suzaki Y, Sato Y, et al. Pathogenesis of fulminant  
687 monkeypox with bacterial sepsis after experimental infection with West African monkeypox virus in  
688 a cynomolgus monkey. *Int J Clin Exp Pathol.* 2014;7(7):4359-70.
- 689 12. Dixon CW. Smallpox. London: J. & A. Churchill Ltd; 1962.
- 690 13. Iwasaki A, Medzhitov R. Control of adaptive immunity by the innate immune system. *Nat*  
691 *Immunol.* 2015;16(4):343-53.
- 692 14. Jain A, Pasare C. Innate control of adaptive immunity: beyond the three-signal paradigm. *J*  
693 *Immunol.* 2017;198(10):3791-800.
- 694 15. Pashine A, Valiante NM, Ulmer JB. Targeting the innate immune response with improved  
695 vaccine adjuvants. *Nat Med.* 2005;11(4 Suppl):S63-8.
- 696 16. Tam HH, Melo MB, Kang M, Pelet JM, Ruda VM, Foley MH, et al. Sustained antigen  
697 availability during germinal center initiation enhances antibody responses to vaccination. *Proc Natl*  
698 *Acad Sci U S A.* 2016;113(43):E6639-E48.
- 699 17. Coffman RL, Sher A, Seder RA. Vaccine adjuvants: putting innate immunity to work.  
700 *Immunity.* 2010;33(4):492-503.
- 701 18. Tschärke DC, Smith GL. A model for vaccinia virus pathogenesis and immunity based on  
702 intradermal injection of mouse ear pinnae. *J Gen Virol.* 1999;80:2751-5.

- 703 19. Reading PC, Smith GL. A kinetic analysis of immune mediators in the lungs of mice infected  
704 with vaccinia virus and comparison with intradermal infection. *J Gen Virol.* 2003;84(Pt 8):1973-83.
- 705 20. Hidalgo A, Chilvers ER, Summers C, Koenderman L. The neutrophil life cycle. *Trends*  
706 *Immunol.* 2019;40(7):584-97.
- 707 21. Sumner RP, Ren H, Ferguson BJ, Smith GL. Increased attenuation but decreased  
708 immunogenicity by deletion of multiple vaccinia virus immunomodulators. *Vaccine.*  
709 2016;34(40):4827-34.
- 710 22. Tschärke DC, Reading PC, Smith GL. Dermal infection with vaccinia virus reveals roles for  
711 virus proteins not seen using other inoculation routes. *J Gen Virol.* 2002;83(Pt 8):1977-86.
- 712 23. O'Connell KE, Mikkola AM, Stepanek AM, Vernet A, Hall CD, Sun CC, et al. Practical  
713 murine hematopathology: a comparative review and implications for research. *Comp Med.*  
714 2015;65(2):96-113.
- 715 24. Naik S, Bouladoux N, Wilhelm C, Molloy MJ, Salcedo R, Kastenmüller W, et al.  
716 Compartmentalized control of skin immunity by resident commensals. *Science.*  
717 2012;337(6098):1115-9.
- 718 25. Gimblet C, Meisel JS, Loesche MA, Cole SD, Horwinski J, Novais FO, et al. Cutaneous  
719 leishmaniasis induces a transmissible dysbiotic skin microbiota that promotes skin inflammation.  
720 *Cell Host Microbe.* 2017;22(1):13-24 e4.
- 721 26. Kennedy EA, King KY, Baldrige MT. Mouse microbiota models: comparing germ-free mice  
722 and antibiotics treatment as tools for modifying gut bacteria. *Front Physiol.* 2018;9:1534.
- 723 27. Dominguez-Bello MG, Godoy-Vitorino F, Knight R, Blaser MJ. Role of the microbiome in  
724 human development. *Gut.* 2019;68(6):1108-14.
- 725 28. Nagpal R, Mainali R, Ahmadi S, Wang S, Singh R, Kavanagh K, et al. Gut microbiome and  
726 aging: physiological and mechanistic insights. *Nutr Healthy Aging.* 2018;4(4):267-85.
- 727 29. Belkaid Y, Hand TW. Role of the microbiota in immunity and inflammation. *Cell.*  
728 2014;157(1):121-41.
- 729 30. Li N, Ma WT, Pang M, Fan QL, Hua JL. The commensal microbiota and viral infection: a  
730 comprehensive review. *Front Immunol.* 2019;10:1551.
- 731 31. Wilks J, Beilinson H, Golovkina TV. Dual role of commensal bacteria in viral infections.  
732 *Immunol Rev.* 2013;255(1):222-9.
- 733 32. Macpherson AJ. Do the microbiota influence vaccines and protective immunity to pathogens?  
734 issues of sovereignty, federalism, and points-testing in the prokaryotic and eukaryotic spaces of the  
735 host-microbial superorganism. *Cold Spring Harb Perspect Biol.* 2018;10(2).
- 736 33. Gallo RL, Hooper LV. Epithelial antimicrobial defence of the skin and intestine. *Nat Rev*  
737 *Immunol.* 2012;12(7):503-16.
- 738 34. Belkaid Y, Segre JA. Dialogue between skin microbiota and immunity. *Science.*  
739 2014;346(6212):954-9.
- 740 35. Sorensen OE, Cowland JB, Theilgaard-Monch K, Liu L, Ganz T, Borregaard N. Wound  
741 healing and expression of antimicrobial peptides/polypeptides in human keratinocytes, a consequence  
742 of common growth factors. *J Immunol.* 2003;170(11):5583-9.

- 743 36. Nakatsuji T, Kao MC, Zhang L, Zouboulis CC, Gallo RL, Huang CM. Sebum free fatty acids  
744 enhance the innate immune defense of human sebocytes by upregulating beta-defensin-2 expression.  
745 *J Invest Dermatol.* 2010;130(4):985-94.
- 746 37. Hickman HD, Reynoso GV, Ngudiankama BF, Rubin EJ, Magadan JG, Cush SS, et al.  
747 Anatomically restricted synergistic antiviral activities of innate and adaptive immune cells in the  
748 skin. *Cell Host Microbe.* 2013;13(2):155-68.
- 749 38. Moss B. Inhibition of HeLa cell protein synthesis by the vaccinia virion. *J Virol.*  
750 1968;2(10):1028-37.
- 751 39. Brook I. Secondary bacterial infections complicating skin lesions. *J Med Microbiol.*  
752 2002;51(10):808-12.
- 753 40. Szafranska AK, Junker V, Steglich M, Nubel U. Rapid cell division of *Staphylococcus aureus*  
754 during colonization of the human nose. *BMC Genomics.* 2019;20(1):229.
- 755 41. Pollitt EJG, Szkuta PT, Burns N, Foster SJ. *Staphylococcus aureus* infection dynamics. *PLoS*  
756 *Pathog.* 2018;14(6):e1007112.
- 757 42. Lima MT, Andrade AC, Oliveira GP, Calixto RS, Oliveira DB, Souza EL, et al. Microbiota is  
758 an essential element for mice to initiate a protective immunity against vaccinia virus. *FEMS*  
759 *Microbiol Ecol.* 2016;92(2).
- 760 43. Bablanian R, Esteban M, Baxt B, Sonnabend JA. Studies on the mechanisms of vaccinia virus  
761 cytopathic effects. I. Inhibition of protein synthesis in infected cells is associated with virus-induced  
762 RNA synthesis. *J Gen Virol.* 1978;39:391-402.
- 763 44. Sanderson CM, Way M, Smith GL. Virus-induced cell motility. *J Virol.* 1998;72(2):1235-43.
- 764 45. Moore JB, Smith GL. Steroid hormone synthesis by a vaccinia enzyme: a new type of virus  
765 virulence factor. *EMBO J.* 1992;11(5):1973-80.
- 766 46. Reading PC, Moore JB, Smith GL. Steroid hormone synthesis by vaccinia virus suppresses  
767 the inflammatory response to infection. *J Exp Med.* 2003;197(10):1269-78.
- 768 47. Kieser KJ, Kagan JC. Multi-receptor detection of individual bacterial products by the innate  
769 immune system. *Nat Rev Immunol.* 2017;17(6):376-90.
- 770 48. Wilson JW, Schurr MJ, LeBlanc CL, Ramamurthy R, Buchanan KL, Nickerson CA.  
771 Mechanisms of bacterial pathogenicity. *Postgrad Med J.* 2002;78(918):216-24.
- 772 49. Goldszmid RS, Trinchieri G. The price of immunity. *Nat Immunol.* 2012;13(10):932-8.
- 773 50. Giamarellos-Bourboulis EJ, Netea MG, Rovina N, Akinosoglou K, Antoniadou A, Antonakos  
774 N, et al. Complex Immune Dysregulation in COVID-19 Patients with Severe Respiratory Failure.  
775 *Cell Host Microbe.* 2020;27(6):992-1000 e3.
- 776 51. Huang C, Wang Y, Li X, Ren L, Zhao J, Hu Y, et al. Clinical features of patients infected  
777 with 2019 novel coronavirus in Wuhan, China. *Lancet.* 2020;395(10223):497-506.
- 778 52. Lucas C, Wong P, Klein J, Castro TBR, Silva J, Sundaram M, et al. Longitudinal analyses  
779 reveal immunological misfiring in severe COVID-19. *Nature.* 2020;584(7821):463-9.
- 780 53. Zhou Z, Ren L, Zhang L, Zhong J, Xiao Y, Jia Z, et al. Heightened Innate Immune Responses  
781 in the Respiratory Tract of COVID-19 Patients. *Cell Host Microbe.* 2020;27(6):883-90 e2.
- 782 54. Habibi MS, Thwaites RS, Chang M, Jozwik A, Paras A, Kirsebom F, et al. Neutrophilic  
783 inflammation in the respiratory mucosa predisposes to RSV infection. *Science.* 2020;370(6513).

- 784 55. Ichinohe T, Pang IK, Kumamoto Y, Peaper DR, Ho JH, Murray TS, et al. Microbiota  
785 regulates immune defense against respiratory tract influenza A virus infection. *Proc Natl Acad Sci U*  
786 *S A*. 2011;108(13):5354-9.
- 787 56. Lamouse-Smith ES, Tzeng A, Starnbach MN. The intestinal flora is required to support  
788 antibody responses to systemic immunization in infant and germ free mice. *PLoS One*.  
789 2011;6(11):e27662.
- 790 57. Gonzalez-Perez G, Lamouse-Smith ES. Gastrointestinal microbiome dysbiosis in infant mice  
791 alters peripheral CD8(+) T cell receptor signaling. *Front Immunol*. 2017;8:265.
- 792 58. Shmeleva EV, Smith GL, Ferguson BJ. Enhanced efficacy of vaccination with vaccinia virus  
793 in old vs. young mice. *Front Immunol*. 2019;10:1780.
- 794 59. Rohart F, Gautier B, Singh A, Le Cao KA. mixOmics: an R package for 'omics feature  
795 selection and multiple data integration. *PLoS Comput Biol*. 2017;13(11):e1005752.
- 796



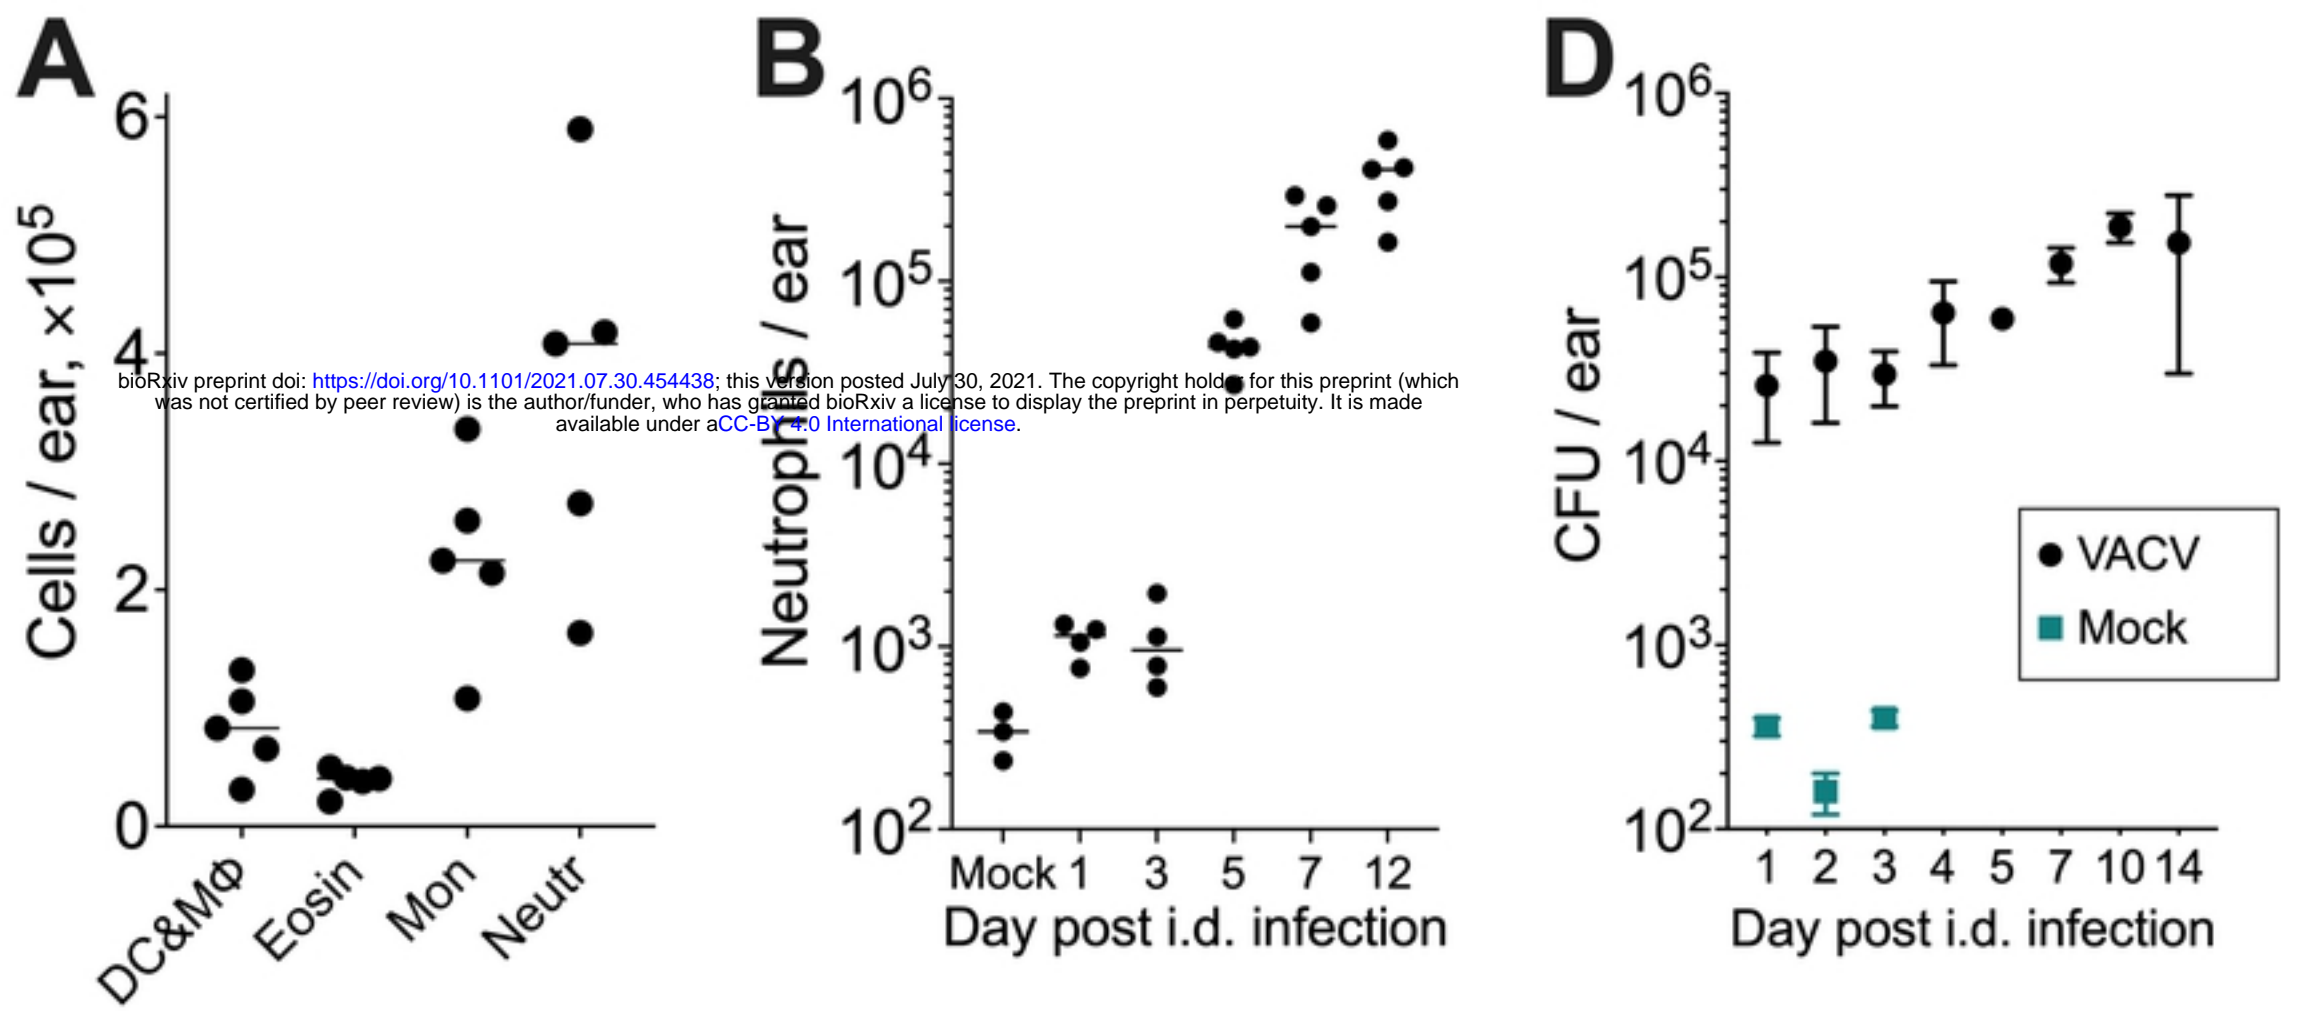

Figure 1

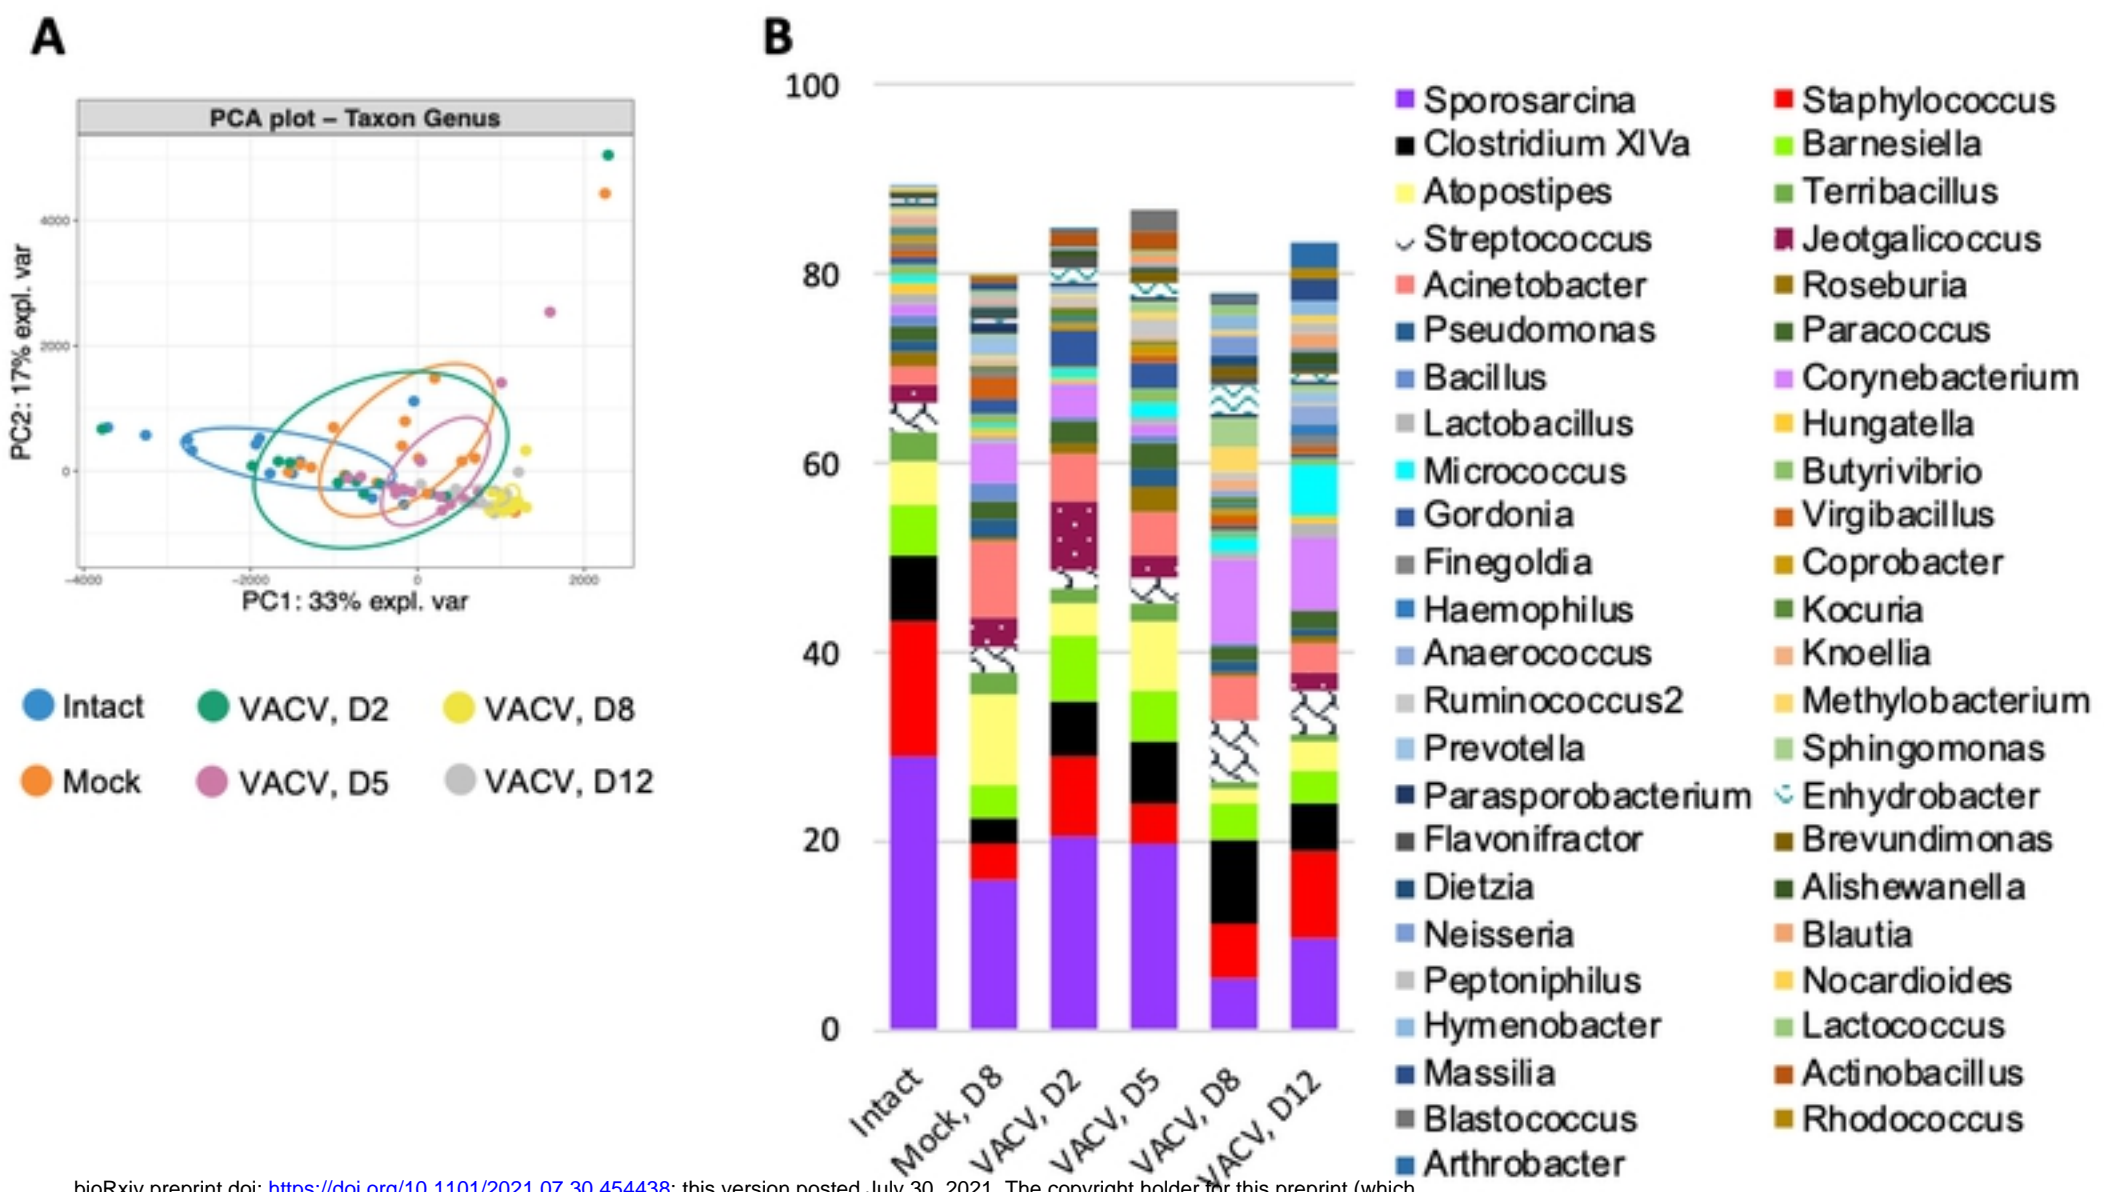

bioRxiv preprint doi: <https://doi.org/10.1101/2021.07.30.454438>; this version posted July 30, 2021. The copyright holder for this preprint (which was not certified by peer review) is the author/funder, who has granted bioRxiv a license to display the preprint in perpetuity. It is made available under aCC-BY 4.0 International license.

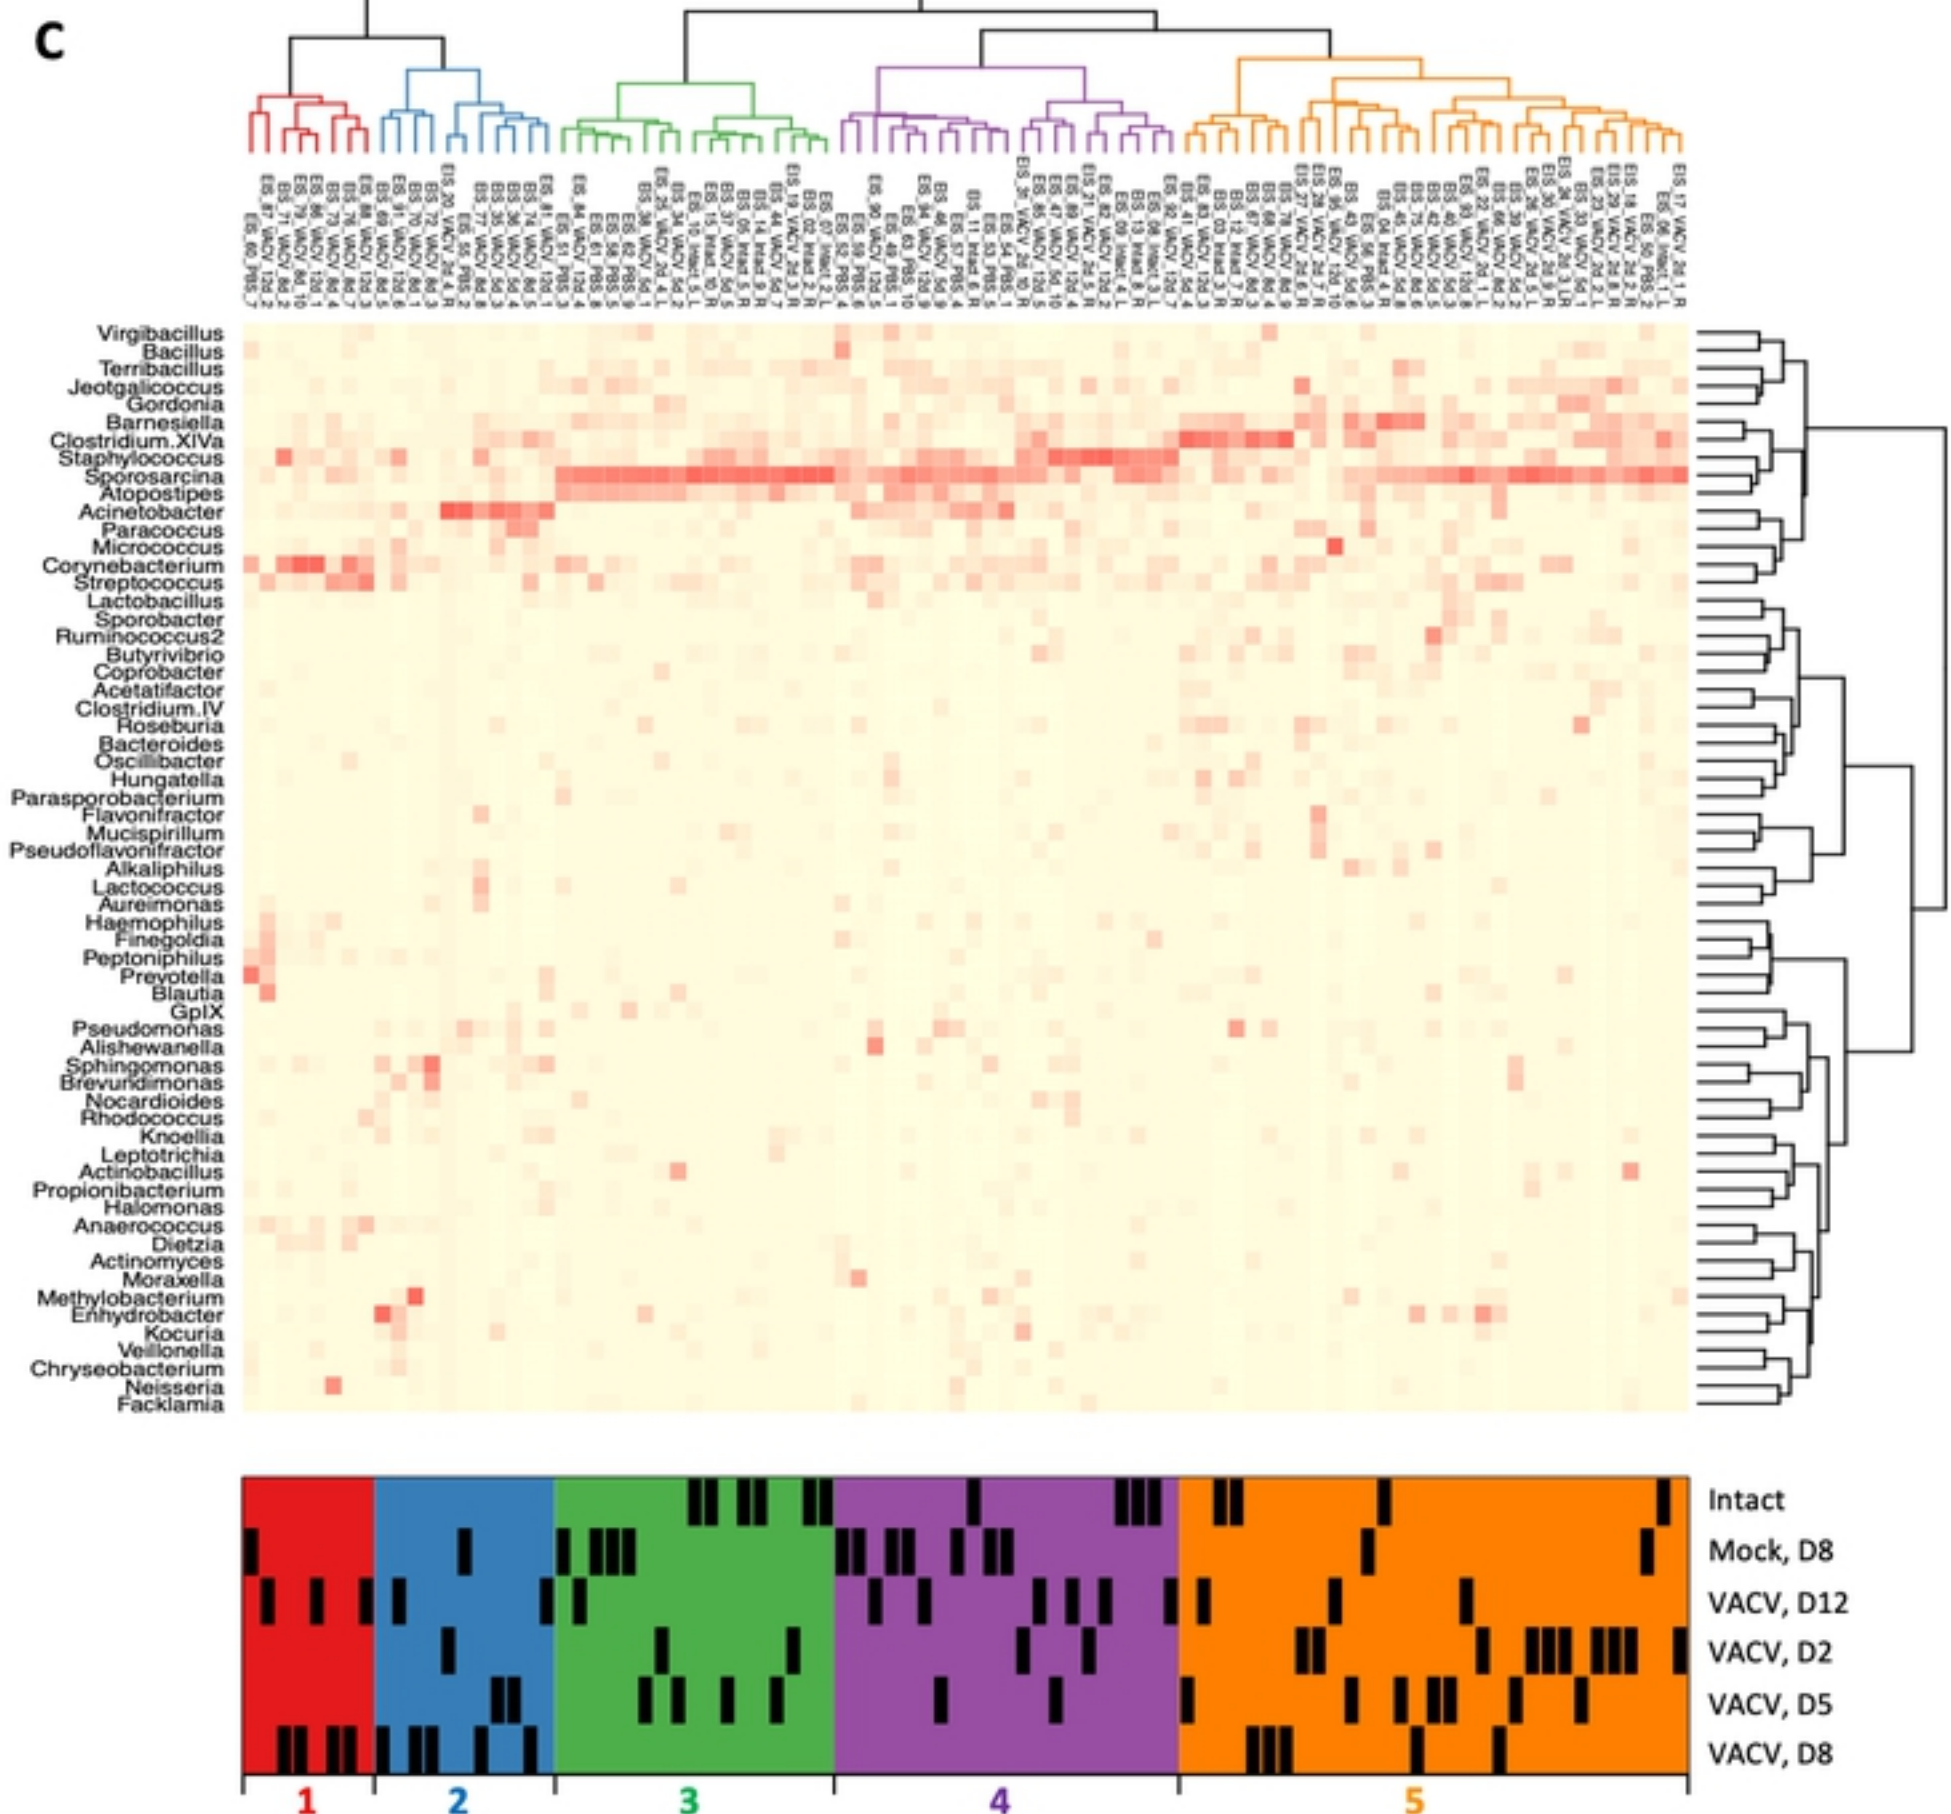

Figure 2

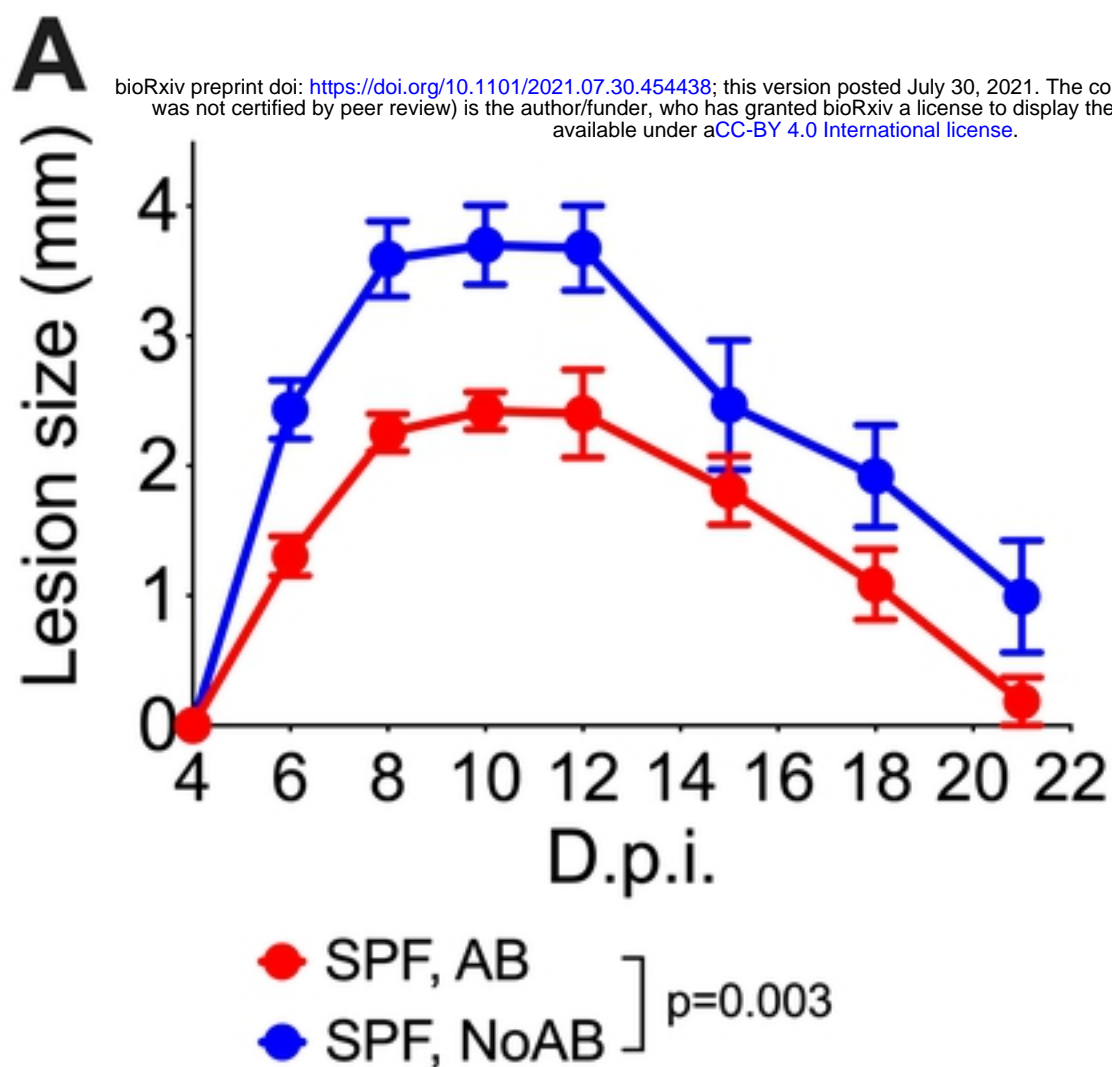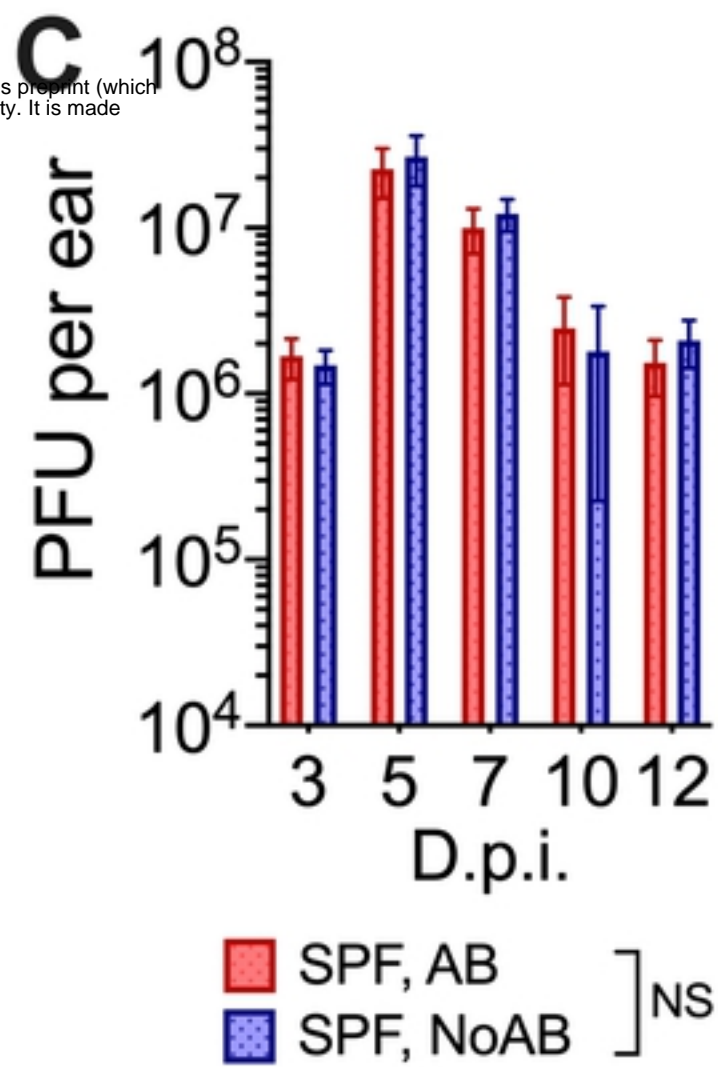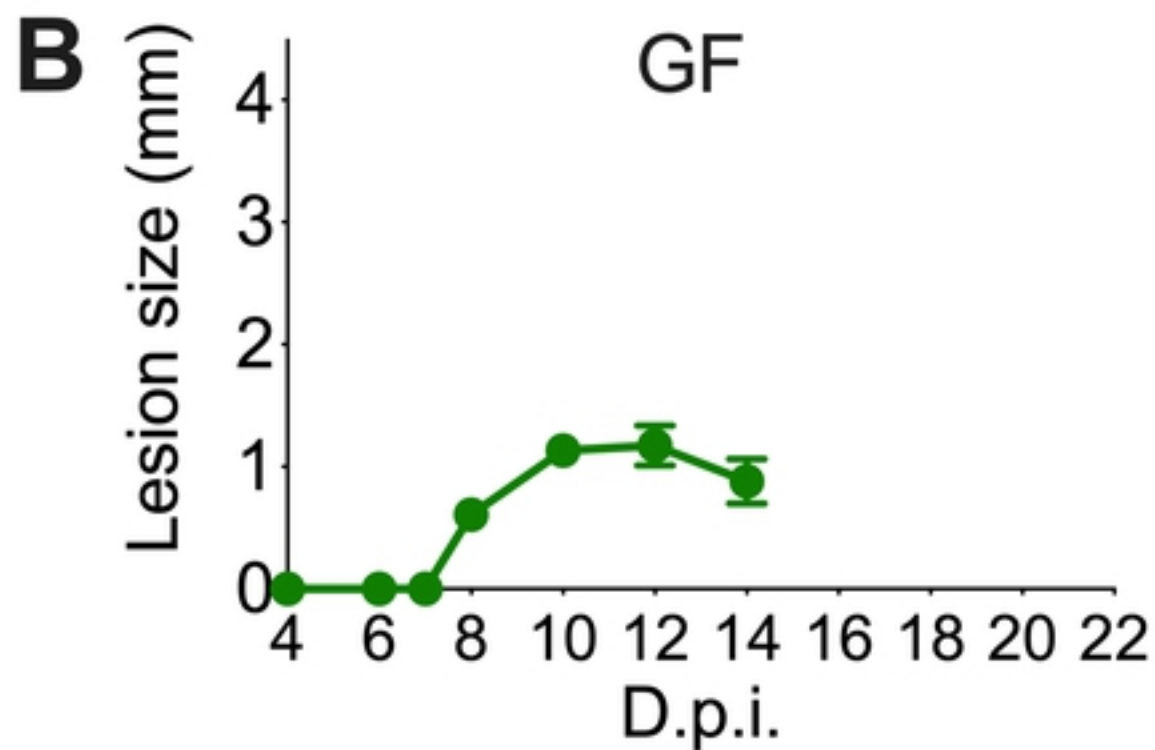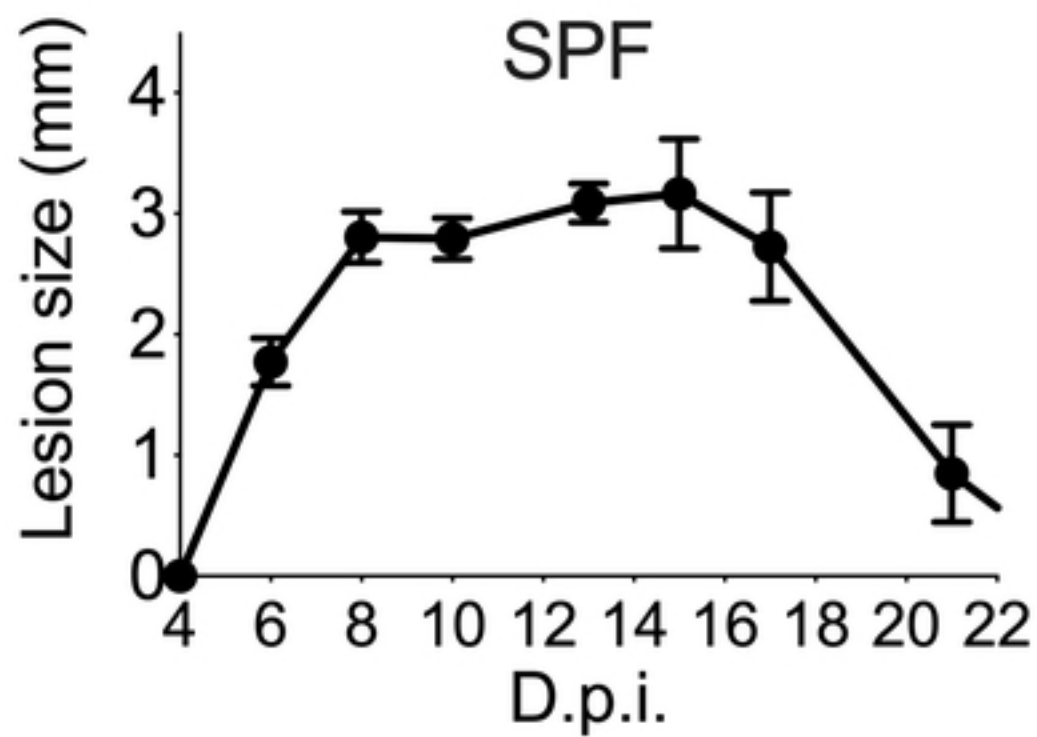

Figure 3

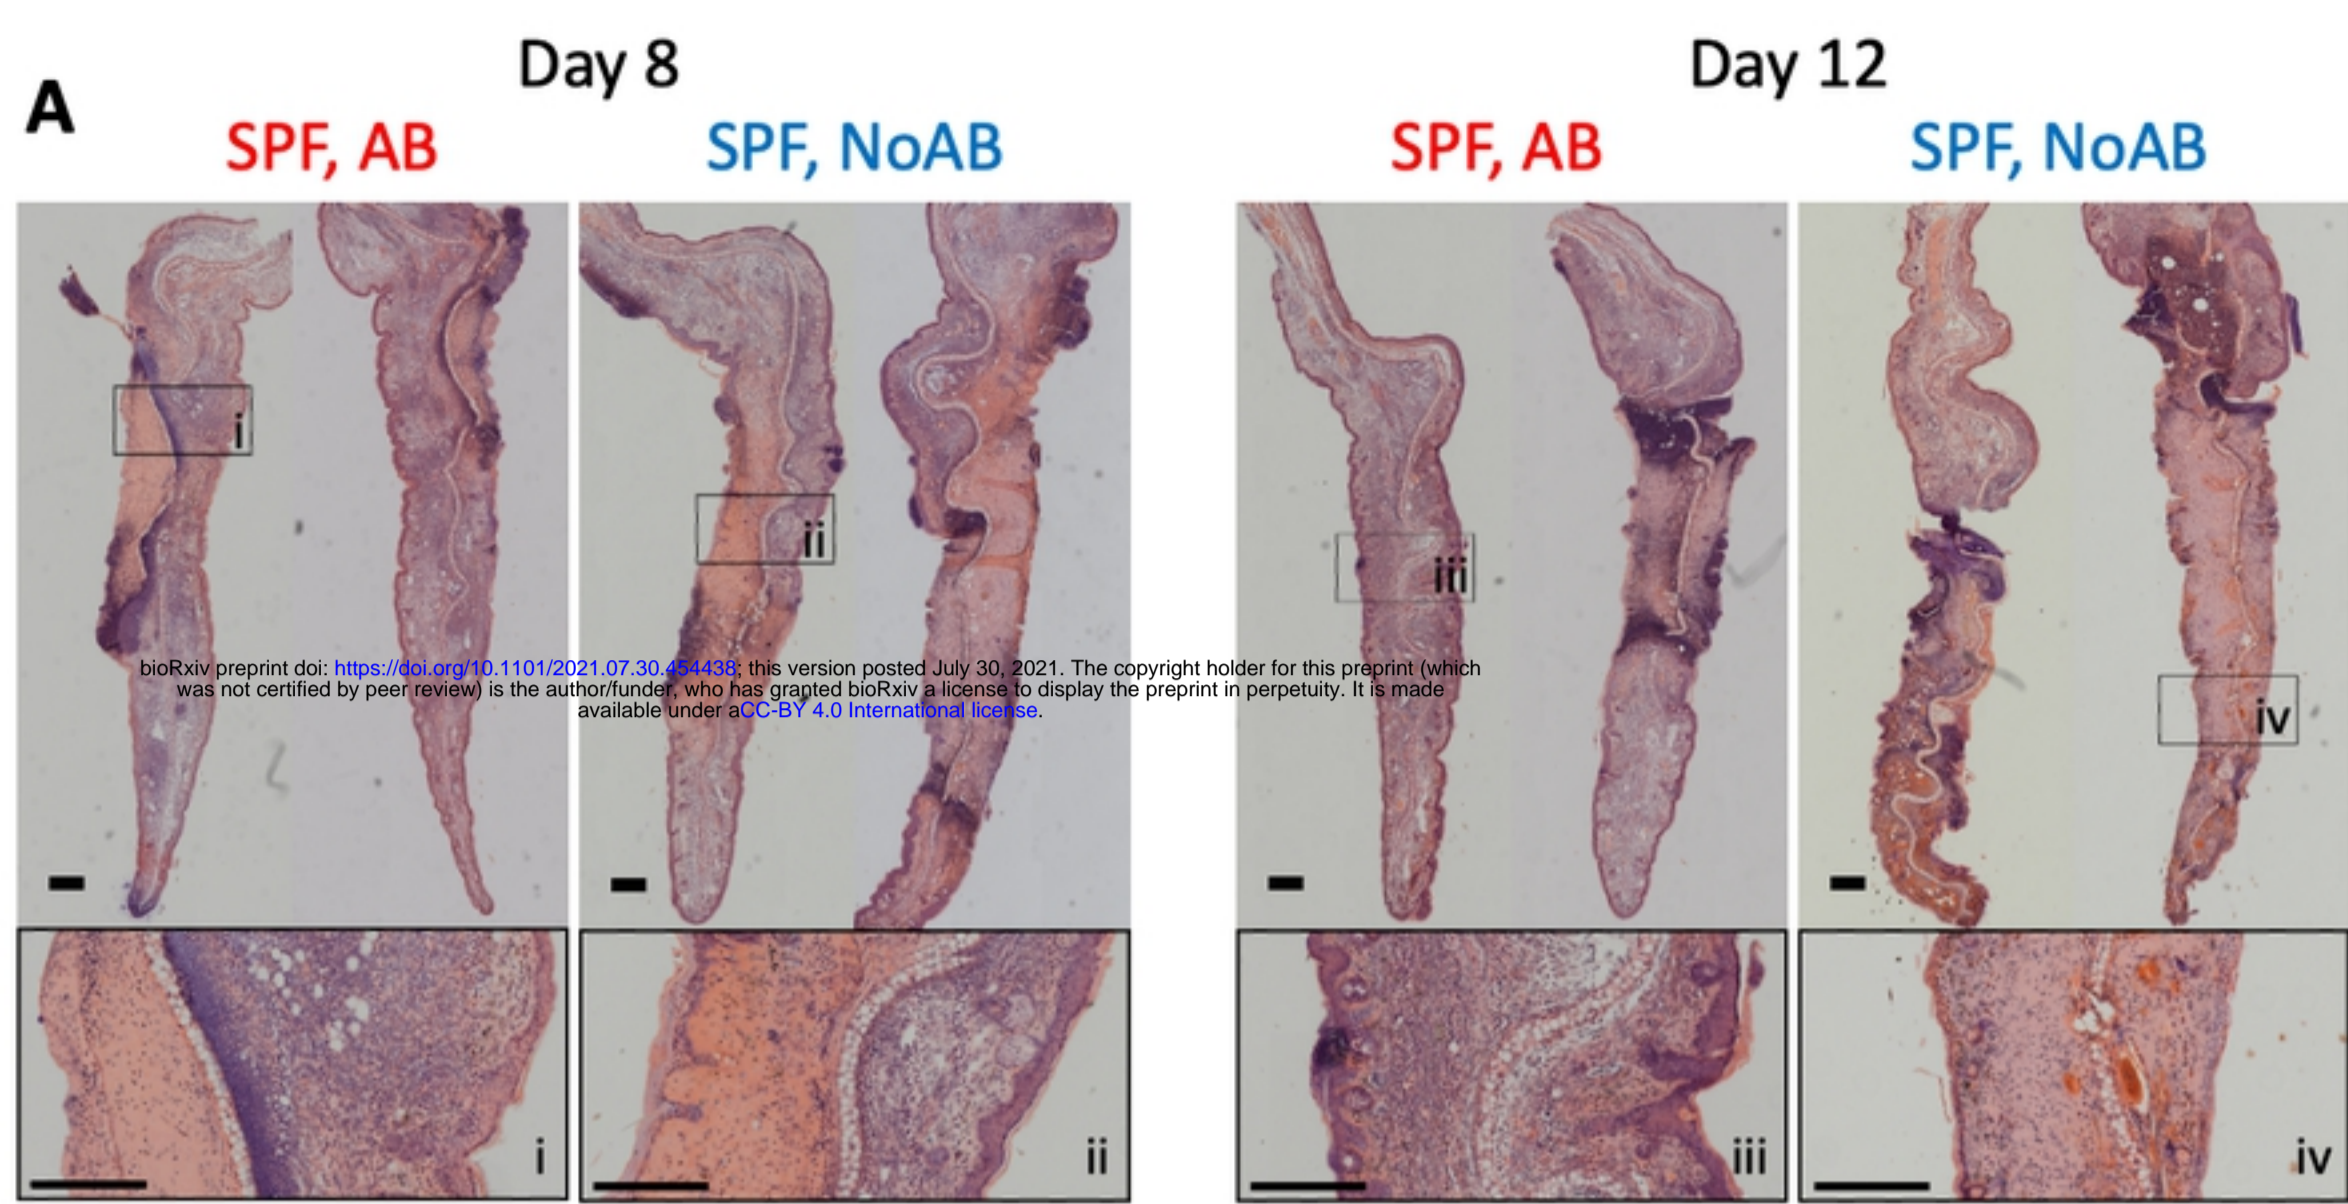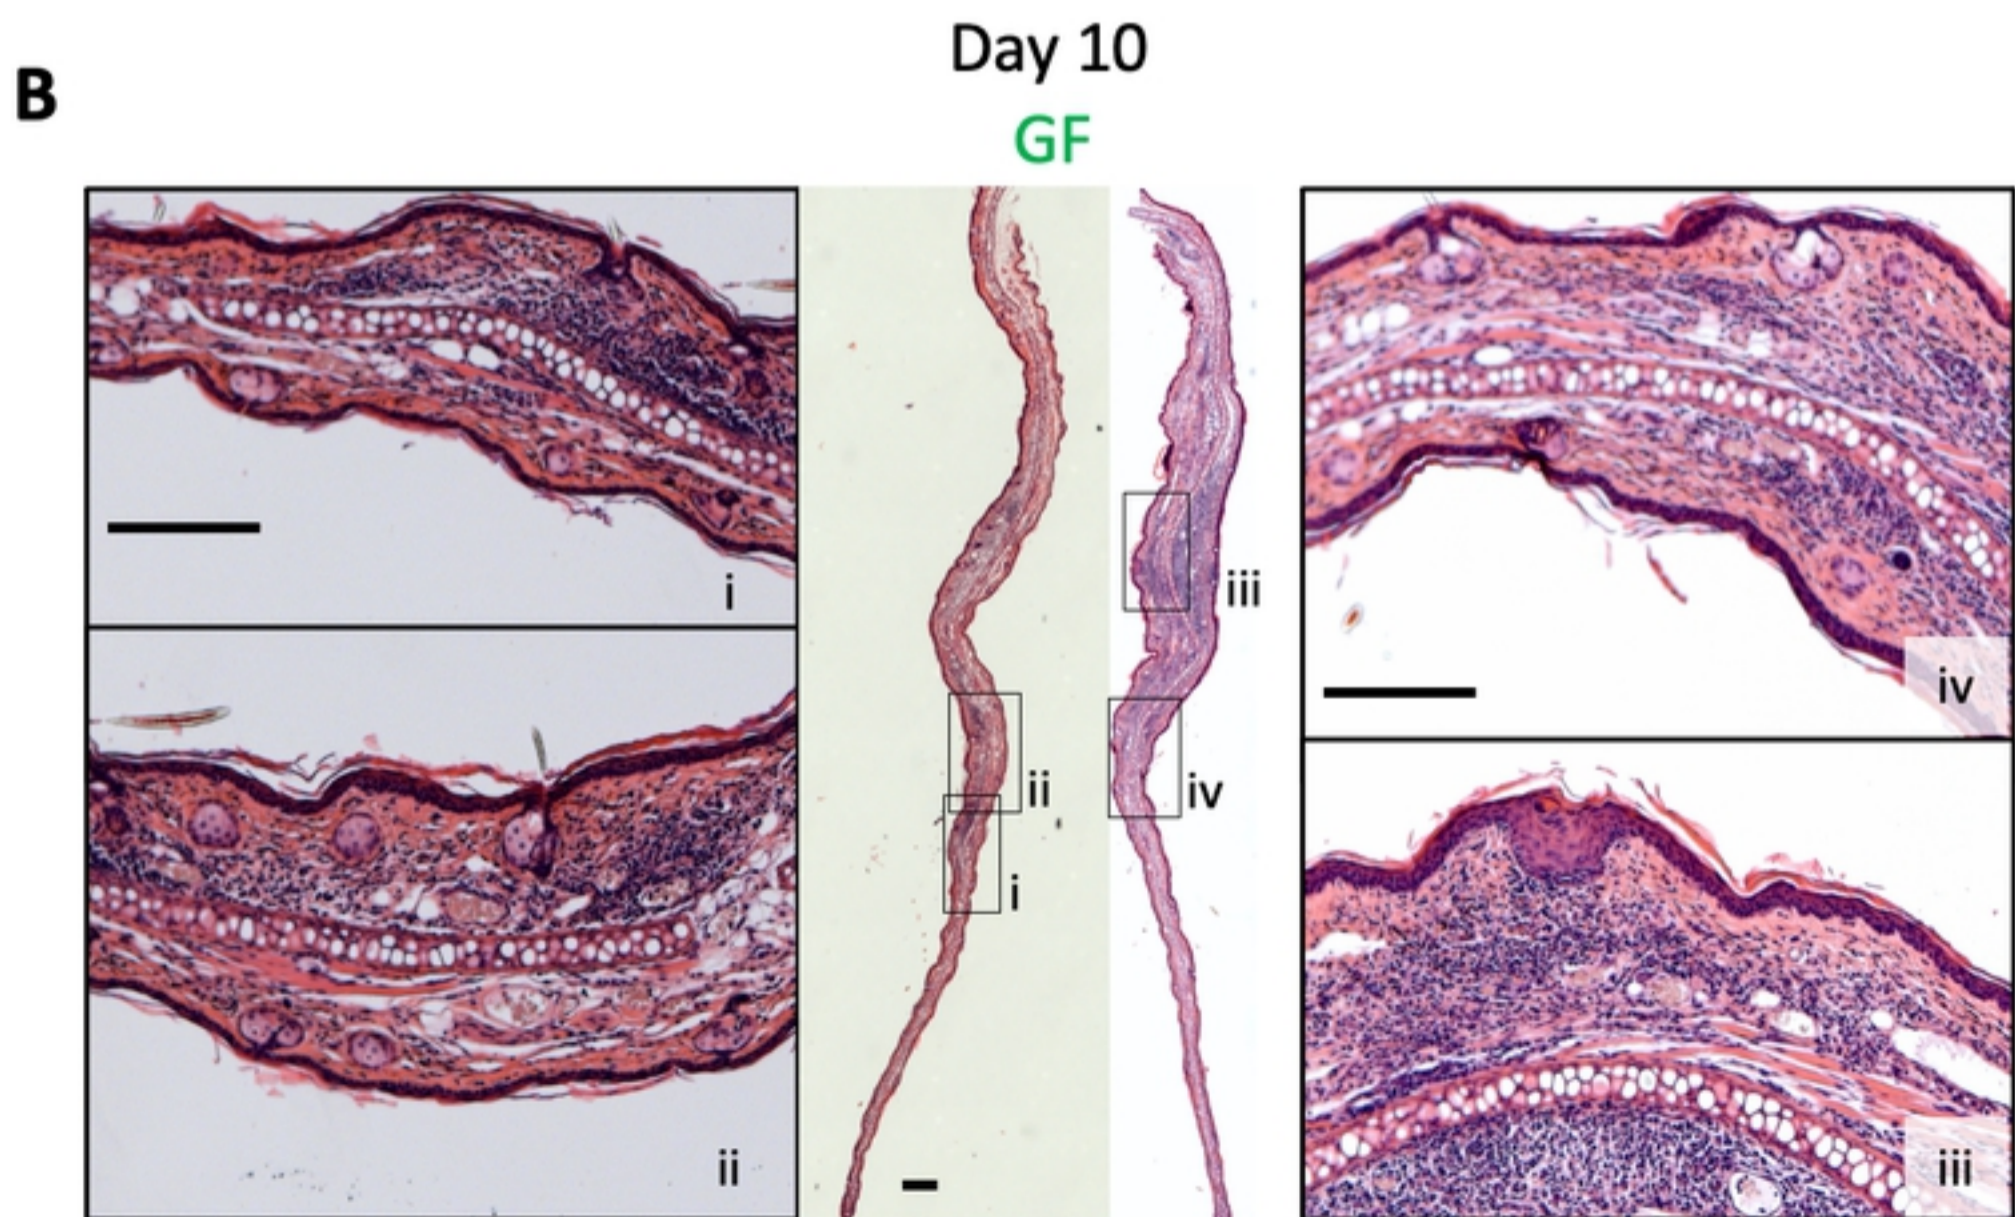

Figure 4

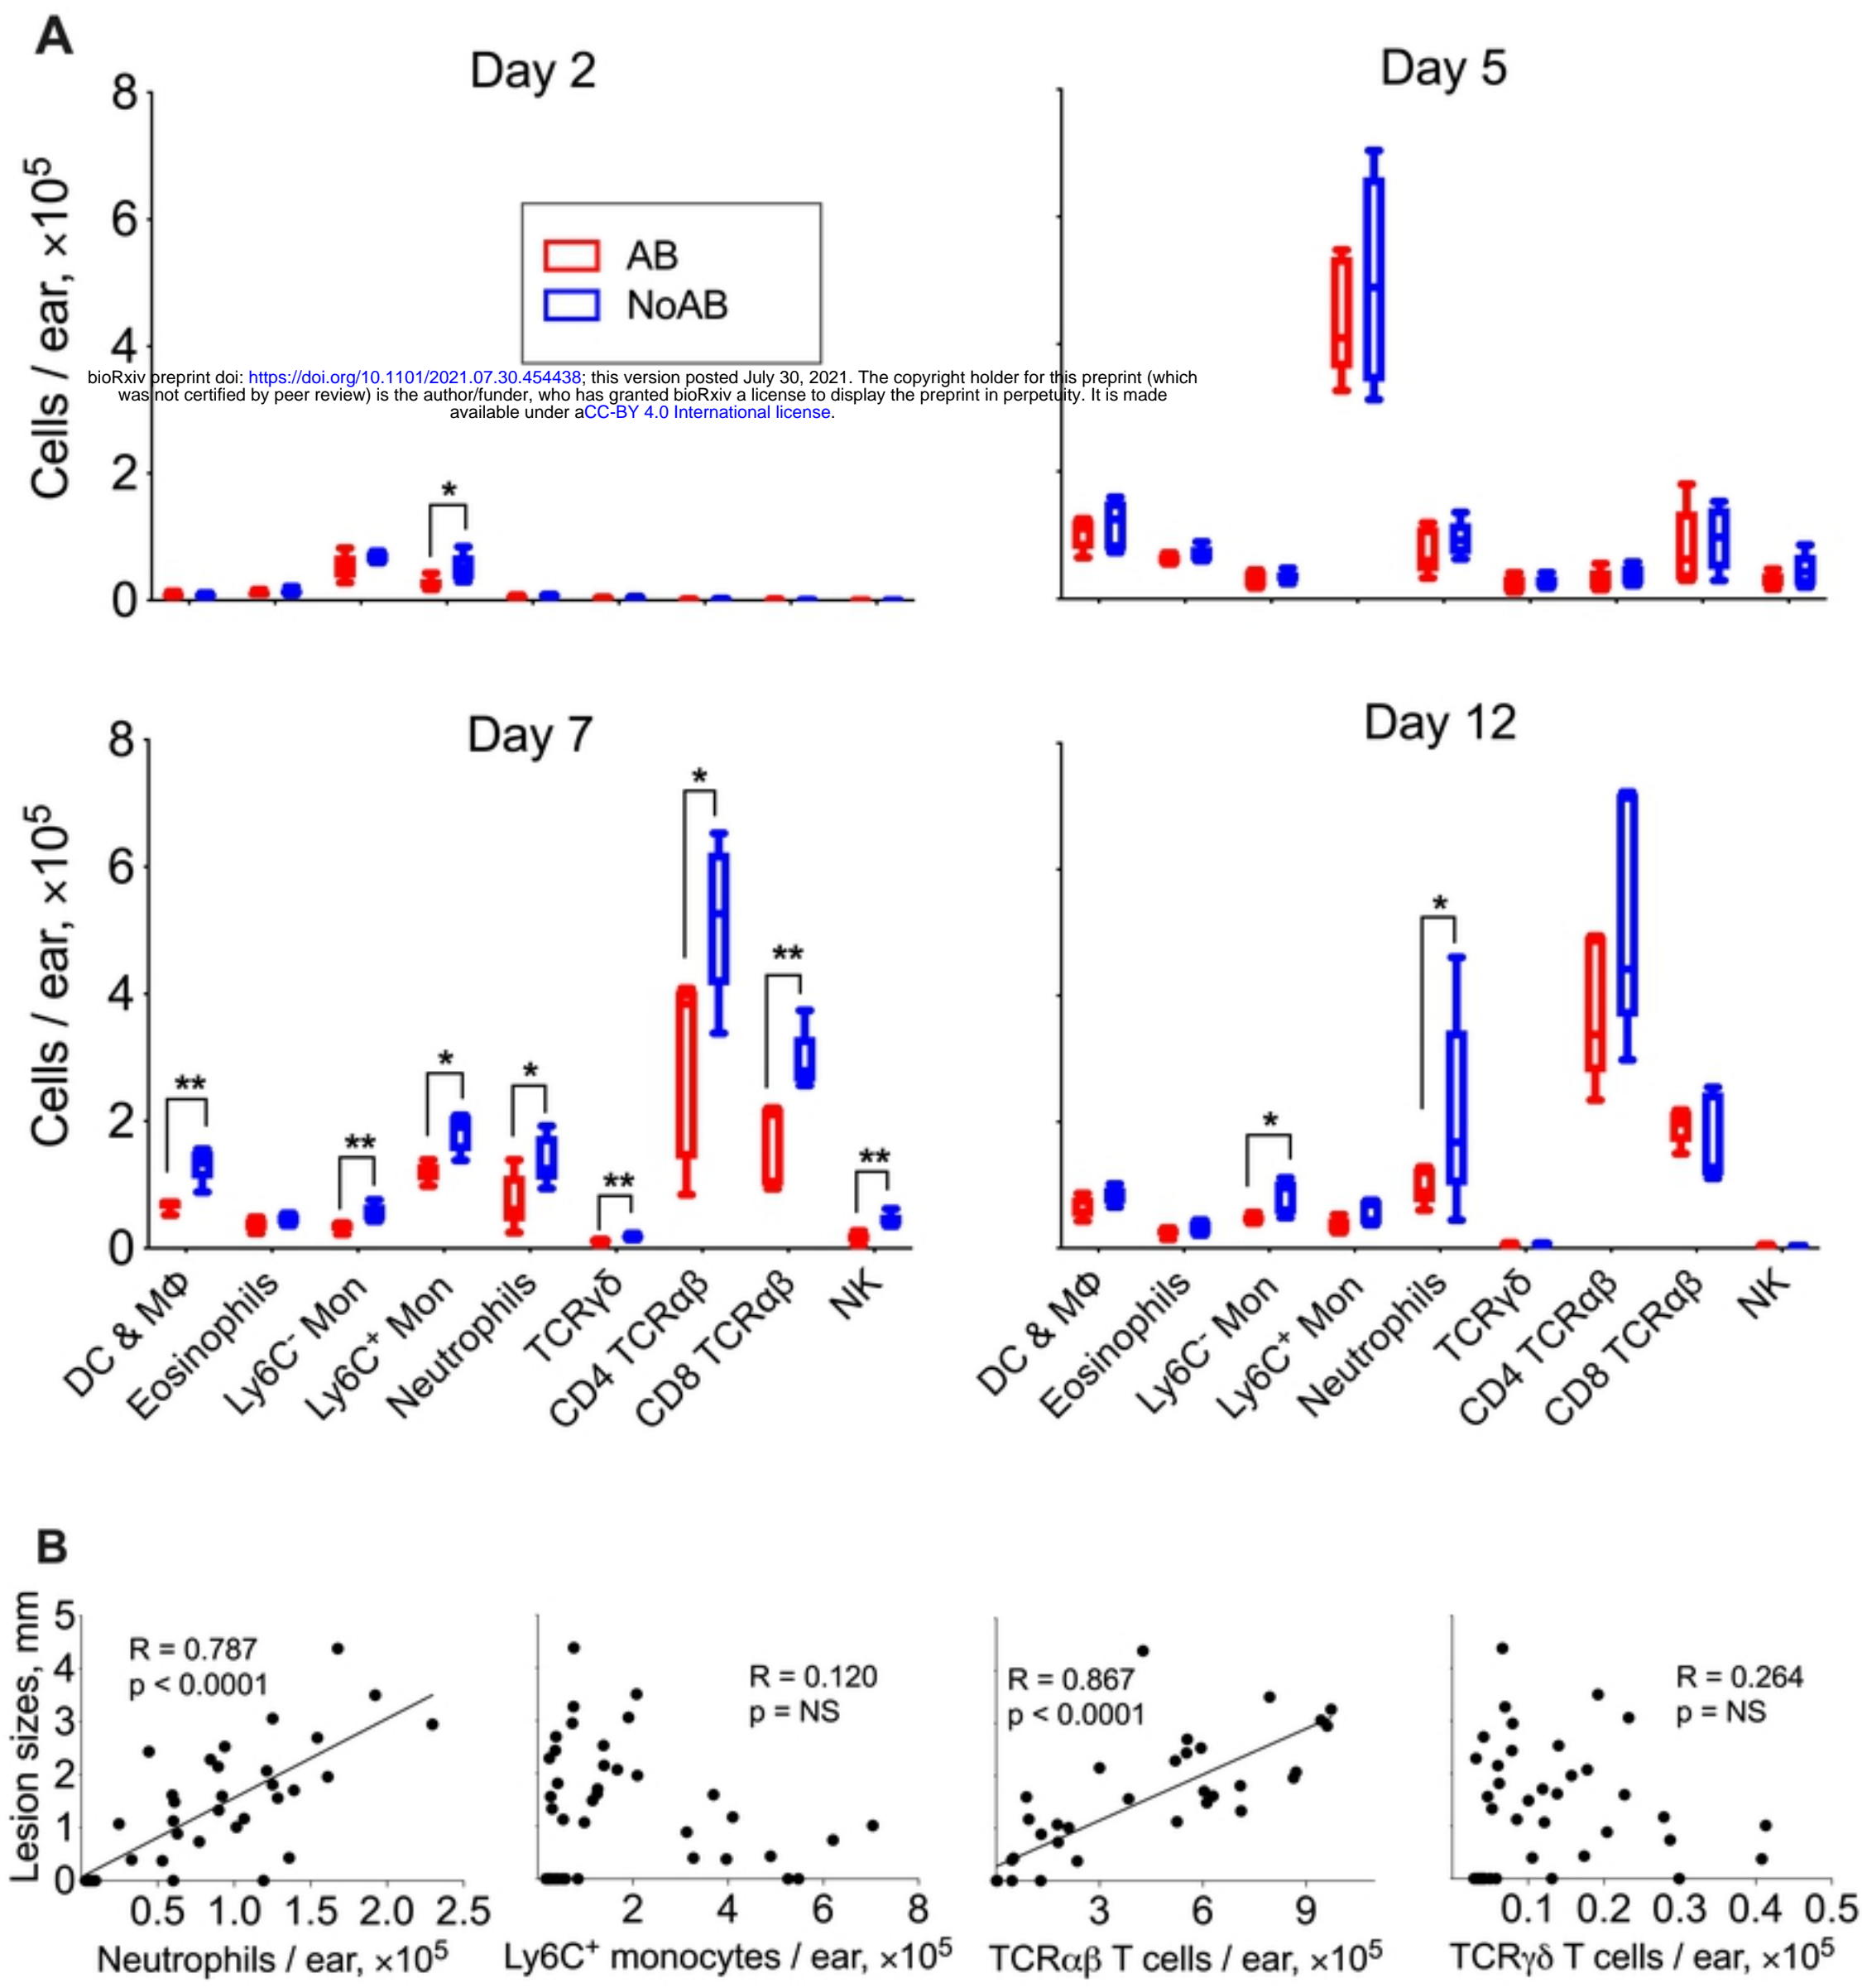

Figure 5

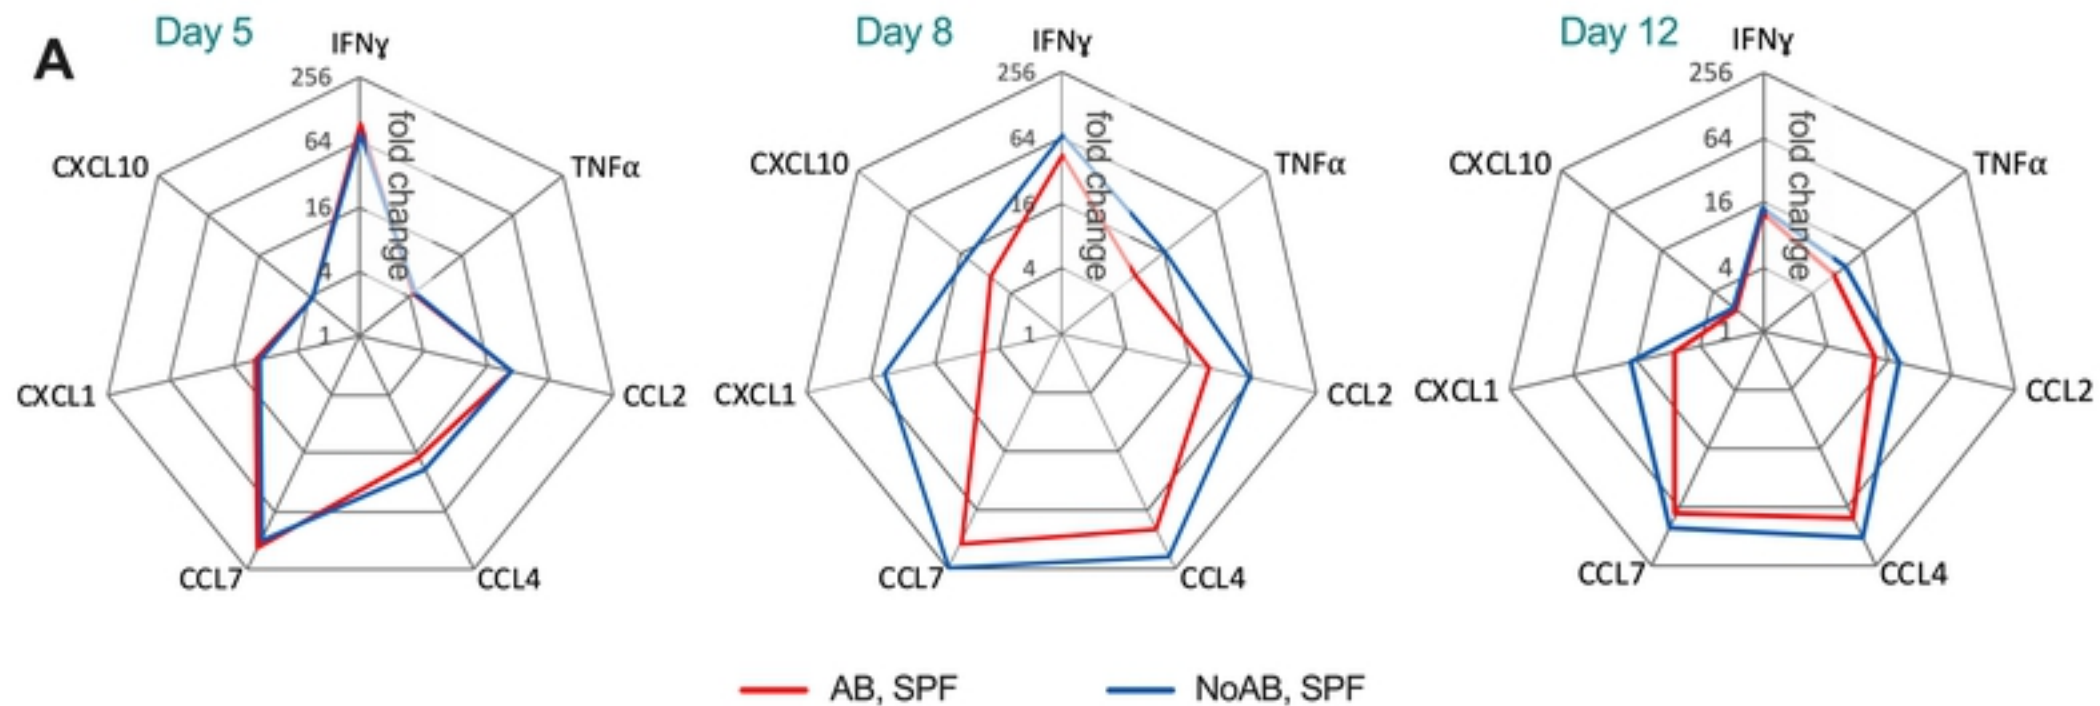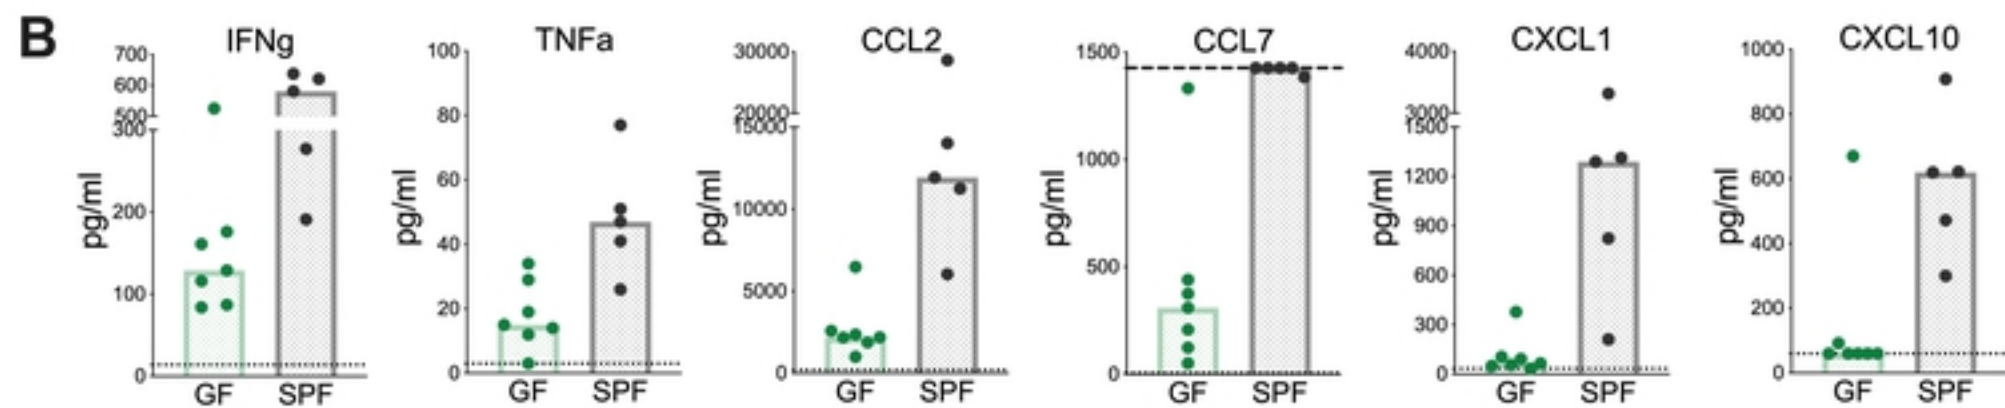

Figure 6

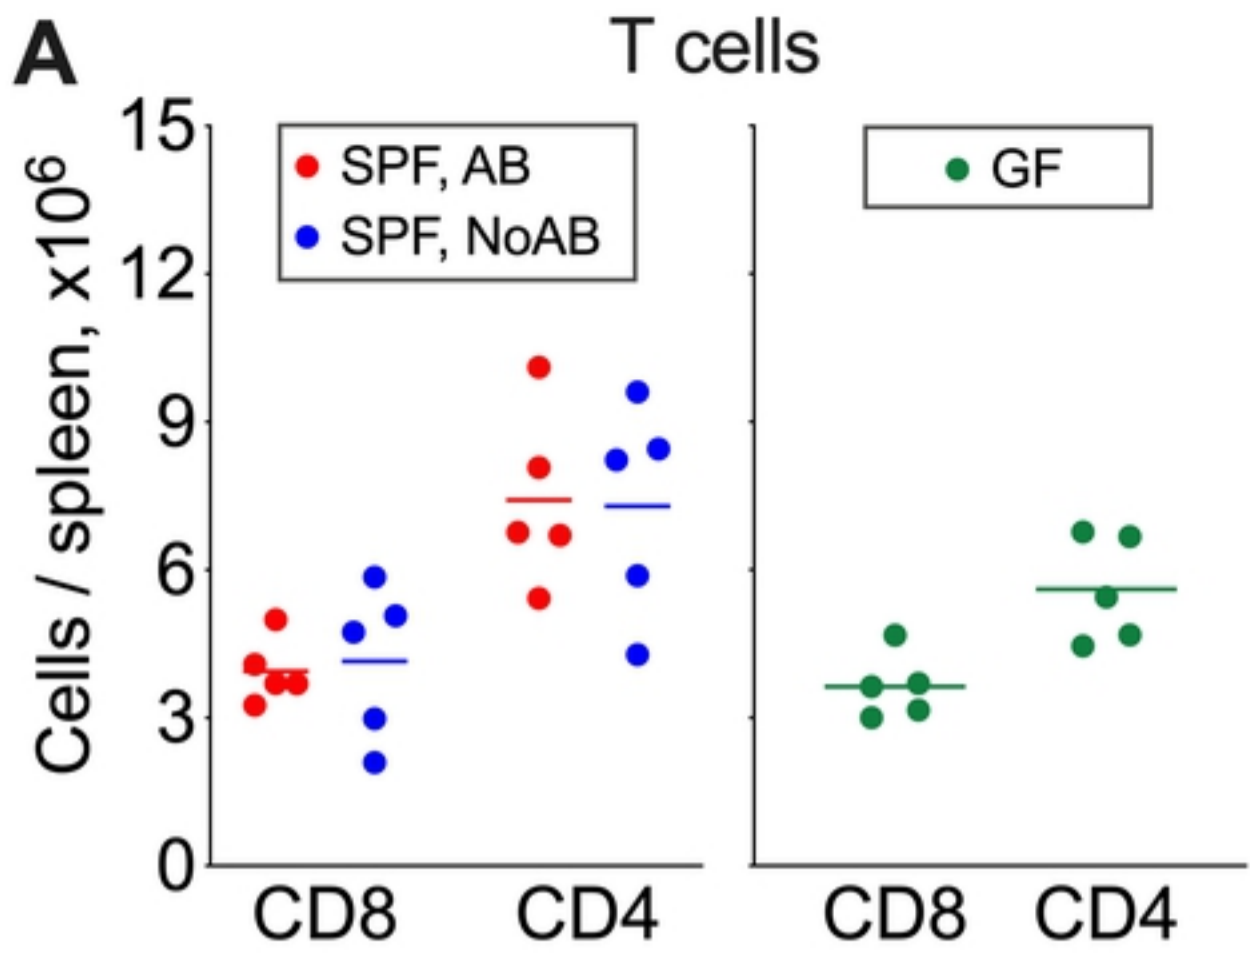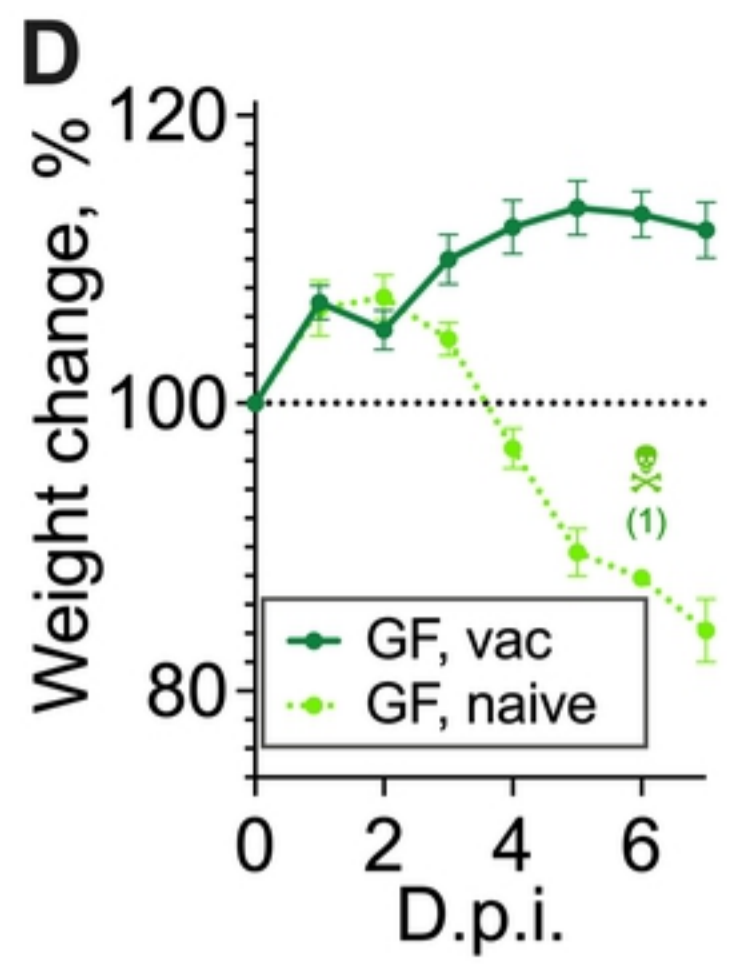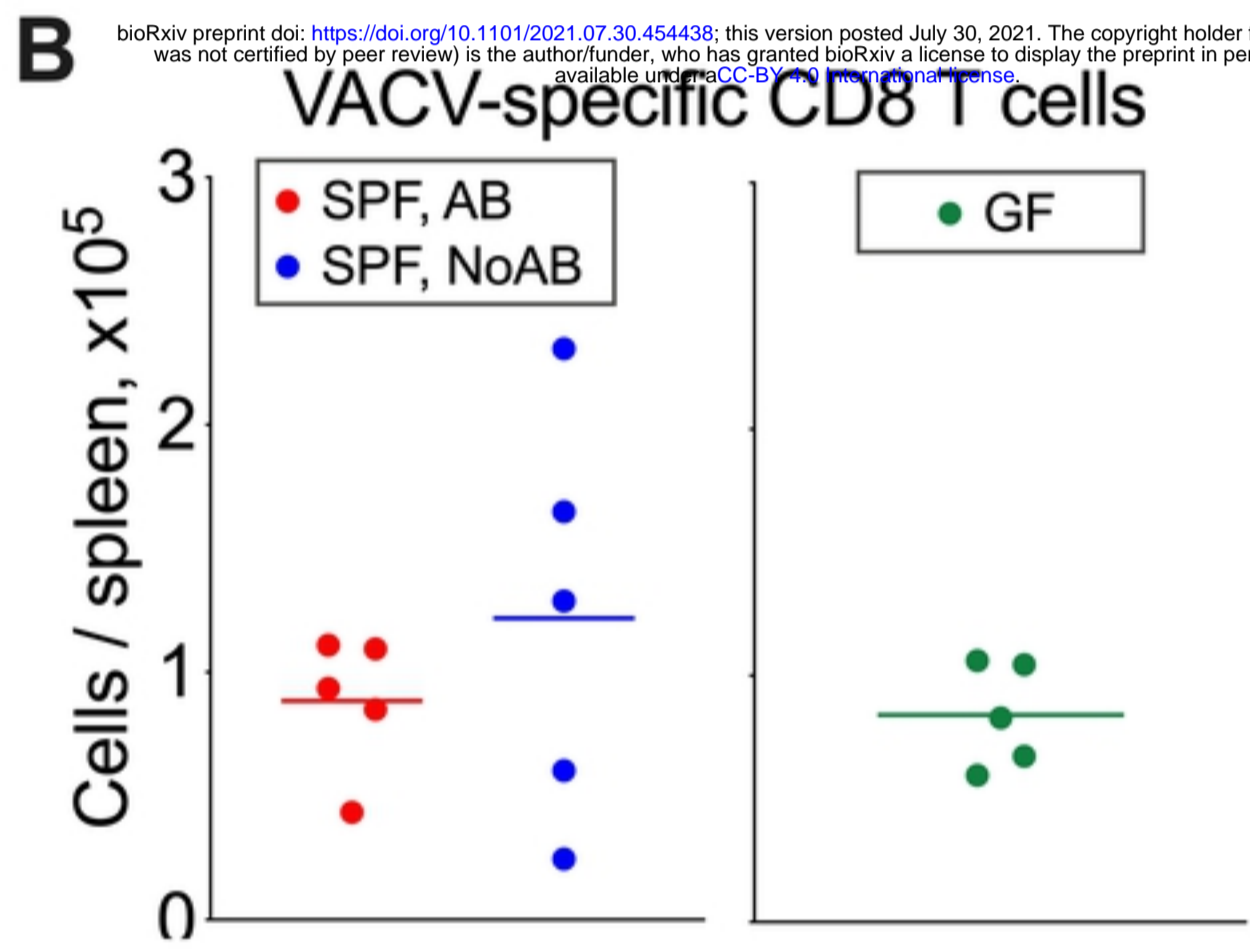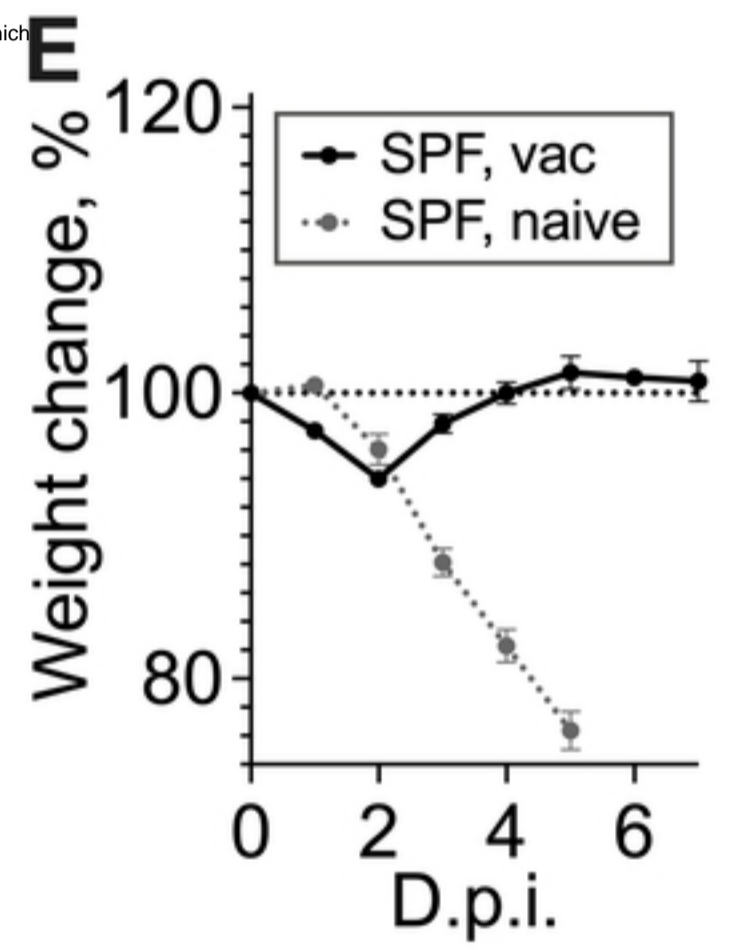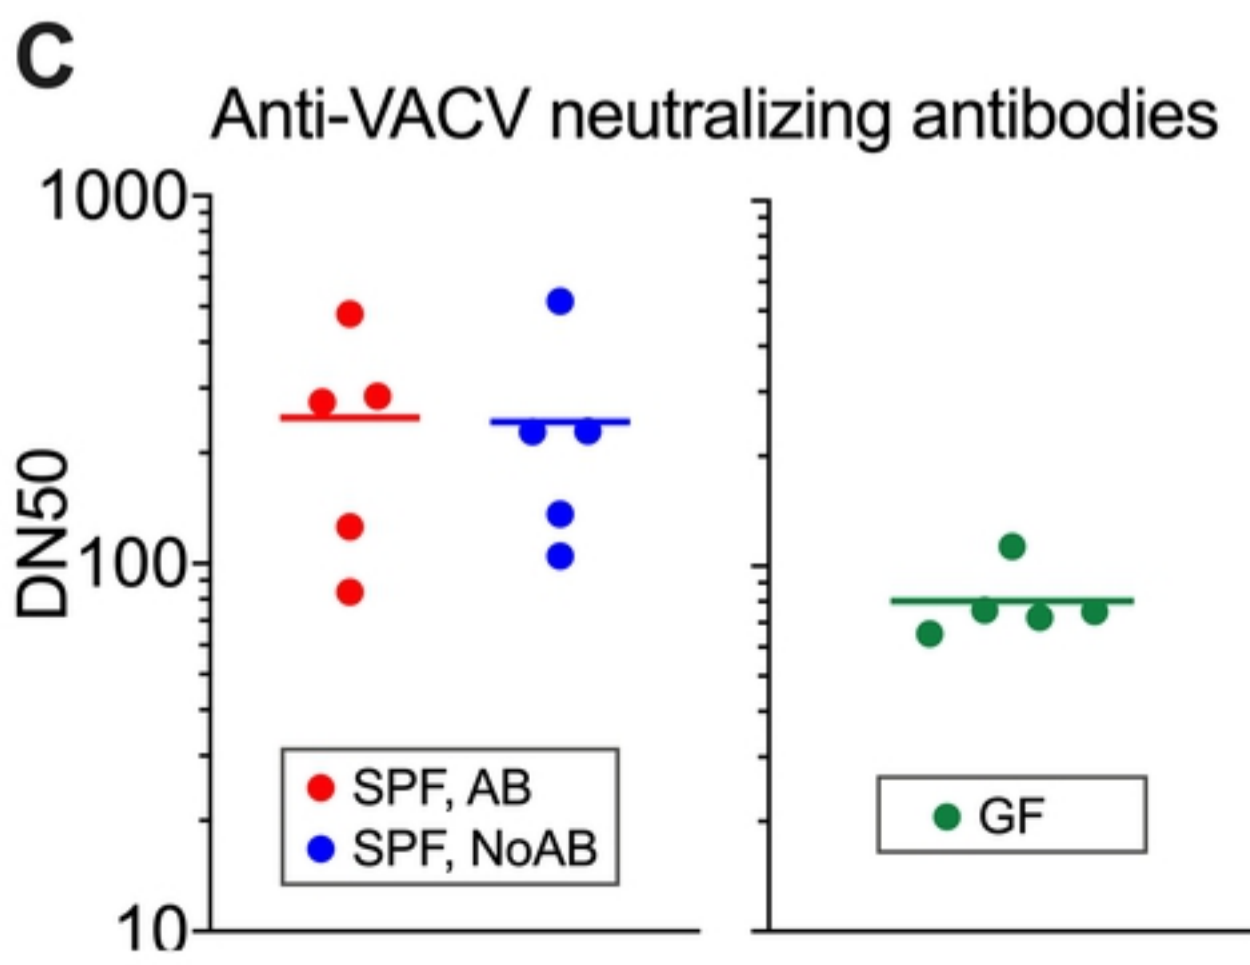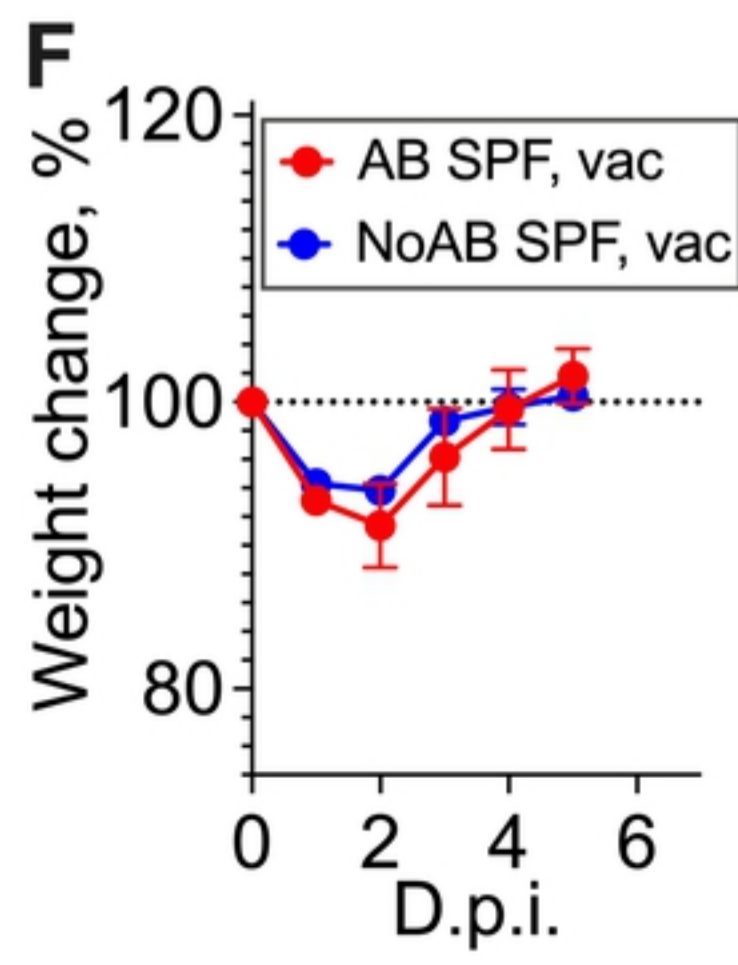

Figure 7

bioRxiv preprint doi: <https://doi.org/10.1101/2021.07.30.454438>; this version posted July 30, 2021. The copyright holder for this preprint (which was not certified by peer review) is the author/funder, who has granted bioRxiv a license to display the preprint in perpetuity. It is made available under aCC-BY 4.0 International license.
